# Supplementary material for: Genome-wide association studies for fatty acid metabolic traits in five divergent pig populations
Source: PubMed Central journal article supplement (PMC4838829; doi:10.1038/srep24718), 2016-04-21
Supplement: srep24718-s1.pdf [file srep24718-s1.pdf]

## **Supplementary Information of:**

# **Genome-wide association studies for fatty acid metabolic traits in five divergent pig populations**

Wanchang Zhang<sup>1,2</sup>, Bin Yang<sup>1,2</sup>, Junjie Zhang<sup>1</sup>, Leilei Cui<sup>1</sup>, Junwu Ma<sup>1</sup>, Congying Chen<sup>1</sup>, Huashui Ai<sup>1</sup>, Shijun Xiao<sup>1</sup>, Jun Ren<sup>1,3</sup> & Lusheng Huang<sup>1</sup>

<sup>1</sup>State Key Laboratory of Pig Genetic Improvement and Production Technology, Jiangxi Agricultural University, Nanchang, 330045, P.R. China

<sup>2</sup>These authors contributed equally to this work.

<sup>3</sup>Correspondence should be addressed to J.R. (email: renjunxau@hotmail.com)

---

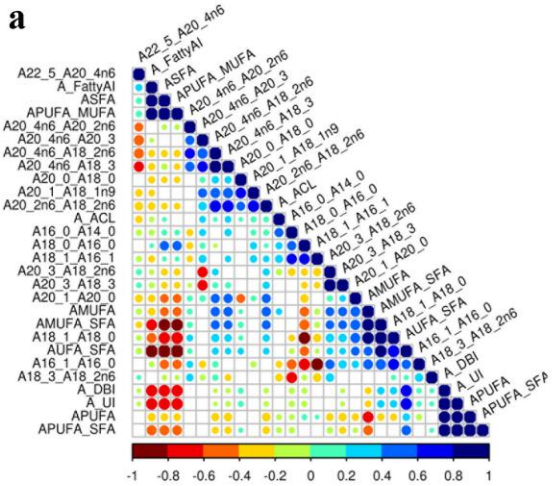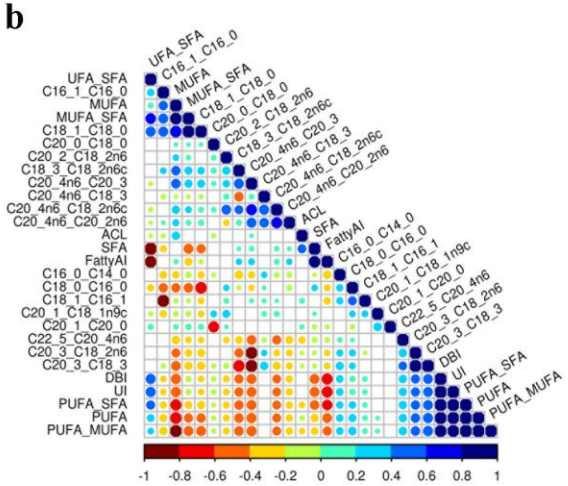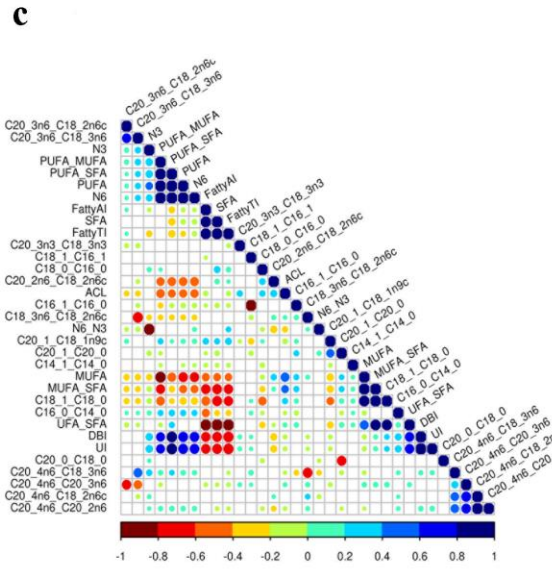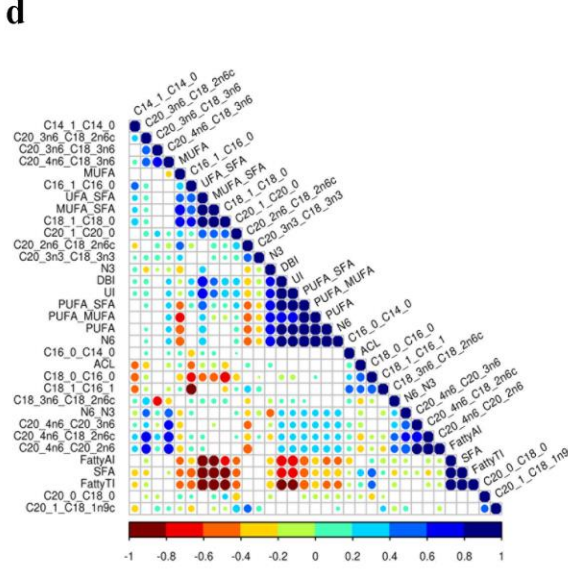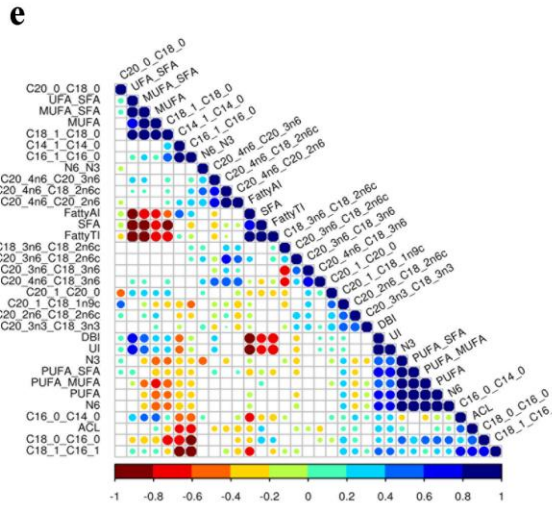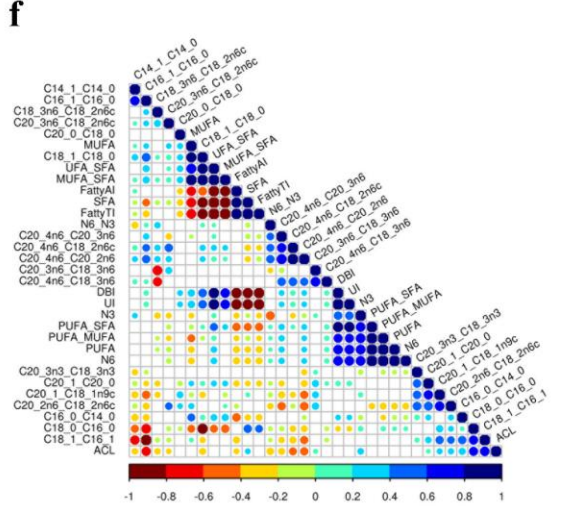

## Supplementary Fig. 1

**Correlation matrix plots between fatty acid metabolic traits in five pig populations, including the F<sub>2</sub> (abdominal fat, a), F<sub>2</sub> (muscle, b), Sutai (c), DLY (d), Erhualian (e), and Laiwu (f) populations.** Correlation coefficients between each pair of traits with  $P < 0.05$  are plotted as dots. Their sizes and colors represent the degree and direction. Blue is positive and red is negative. The larger the dot, the stronger the correlation coefficient. All diagonal elements are marked above the corresponding column of the traits.

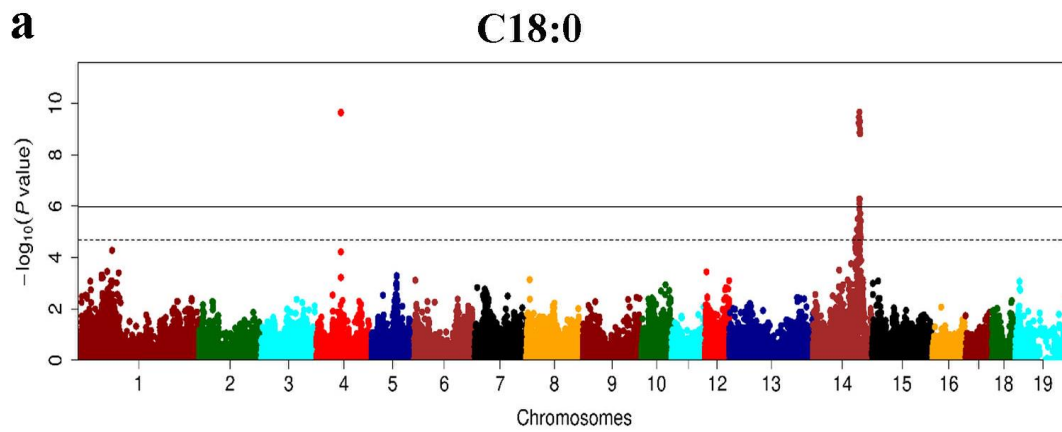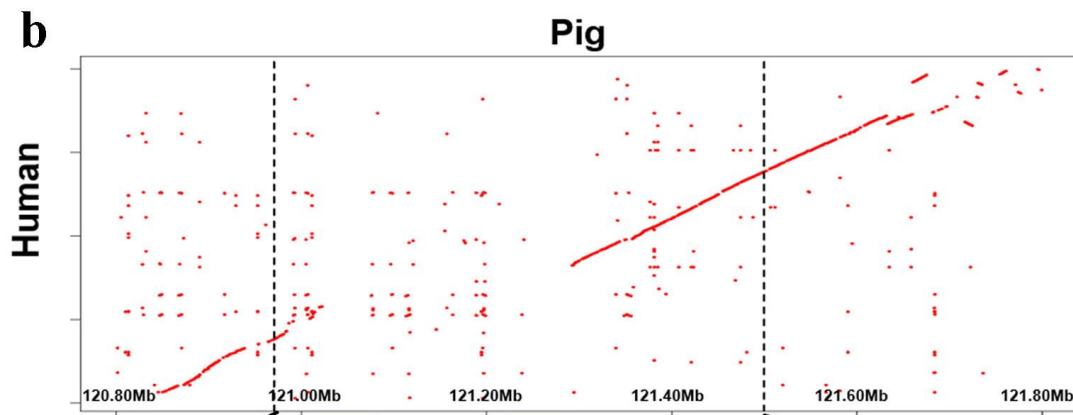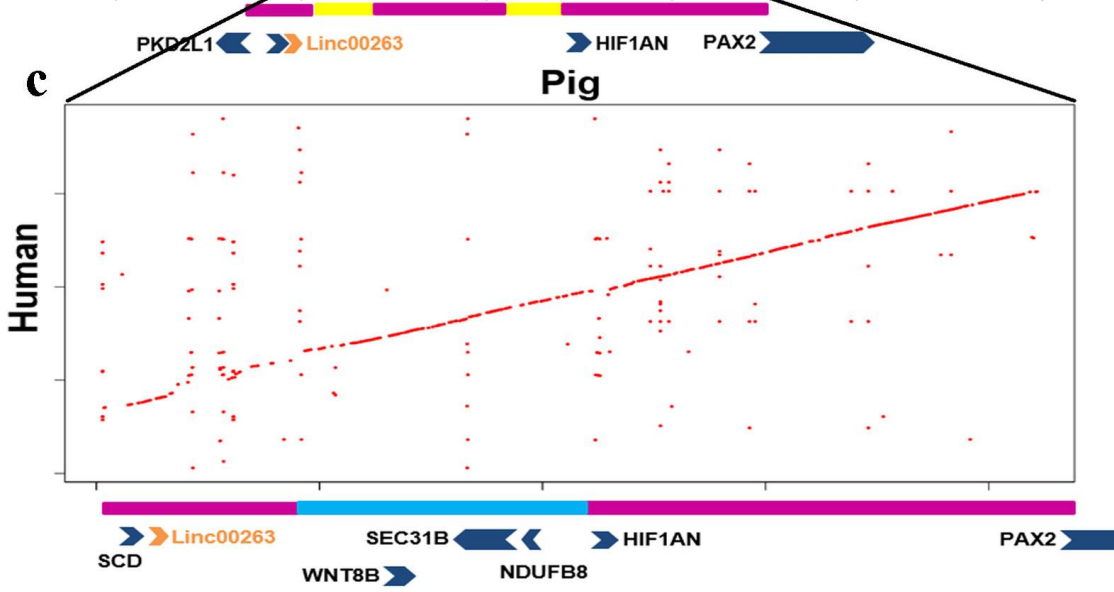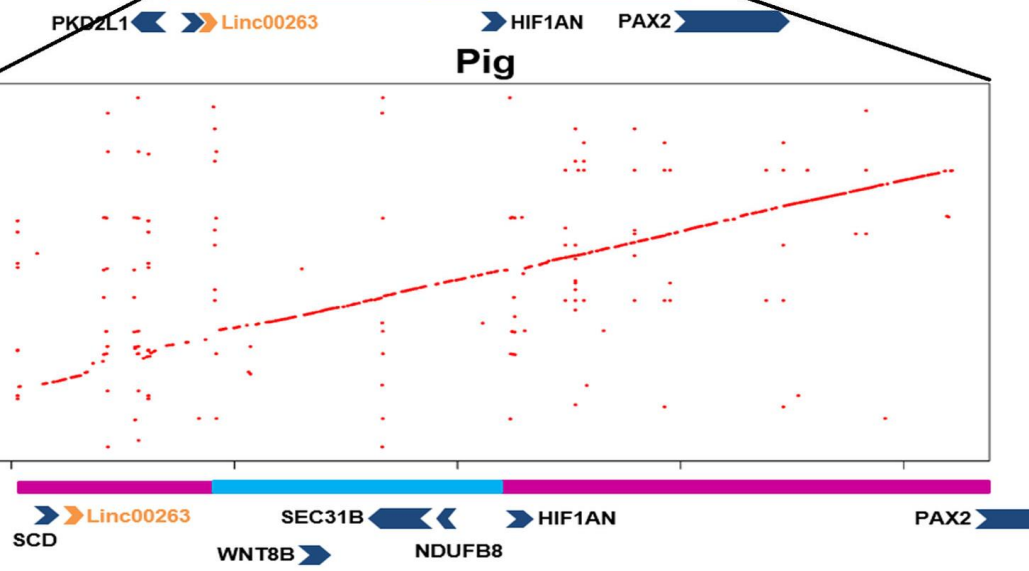

## Supplementary Fig. 2

**Human-pig comparative genomic analysis of the QTL region on SSC14 that is significantly associated with C16:1n7/C16:0 and C18:1n9/C18:0 in the F<sub>2</sub>, Sutai and DLY populations.** (a) Manhattan plot of GWAS results for C18:1 content in the F<sub>2</sub> population. A SNP on chromosome 4 shows association strength similar to the region around 121 Mb on chromosome 14. (b) The purple line represents a 580 kb QTL region on chromosome 14 in pig; the yellow lines indicates two sequence gaps. (c) After realignment with sequence of pig chromosome 4 (blue line), the reassembled sequence of the SSC14 QTL shows better homology with human genome sequence.

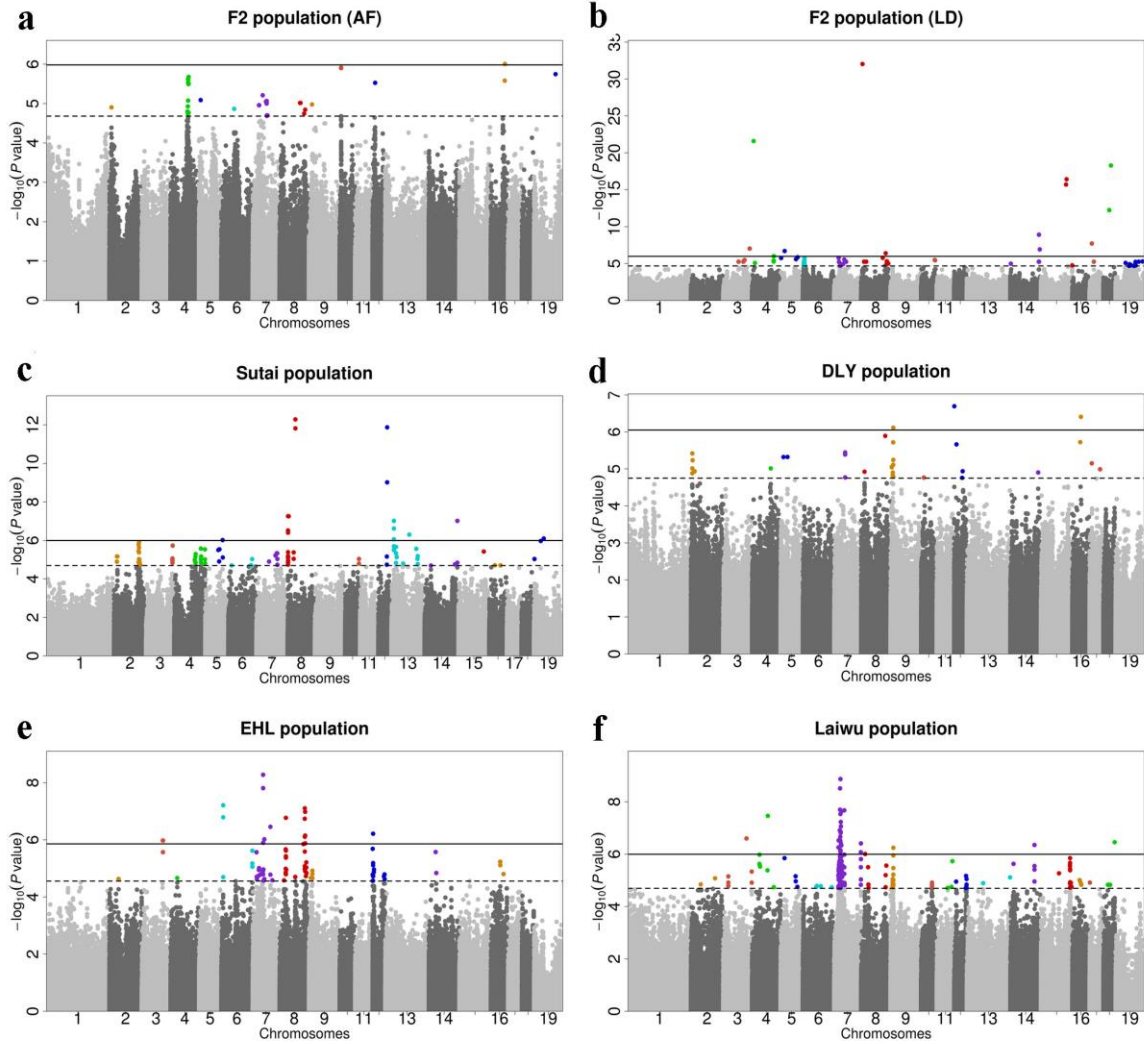

### Supplementary Fig. 3

**Manhattan plots of conditional GWAS results across five populations.** Conditional GWAS results are shown for the F<sub>2</sub> (abdominal fat, **a**), F<sub>2</sub> (muscle, **b**), Sutai (**c**), DLY (**d**), Erhualian (**e**) and Laiwu (**f**) populations. The solid line represents the genome-wide threshold ( $0.05/N$ ). The dash line indicates the suggestive threshold ( $1/N$ ).  $N$  represents the number of SNP that passed quality control. Significant signals surpassing the suggestive threshold on different chromosomes are plotted with different colors.

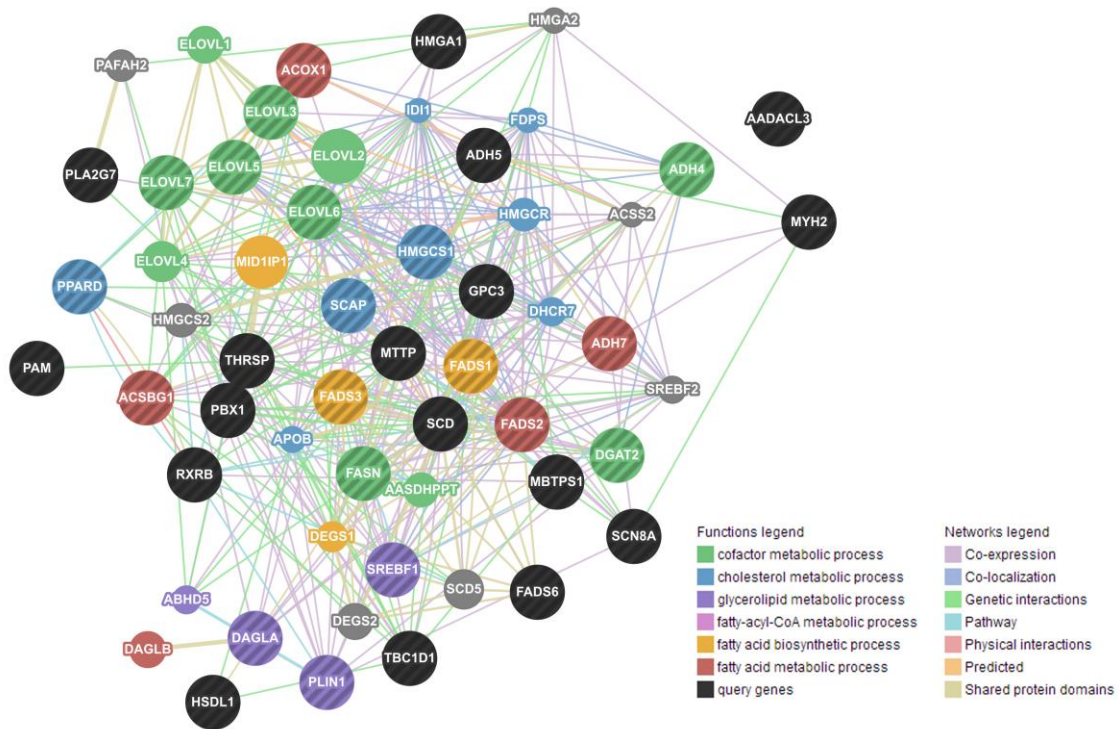

**Supplementary Fig. 4**

**Gene networks and functional pathways for candidate genes highlighted in this study.** GeneMANIA was explored to construct networks of candidate genes. Nodes represent candidate genes and links indicate different interactive connections. Links of different colors are different interactive networks.

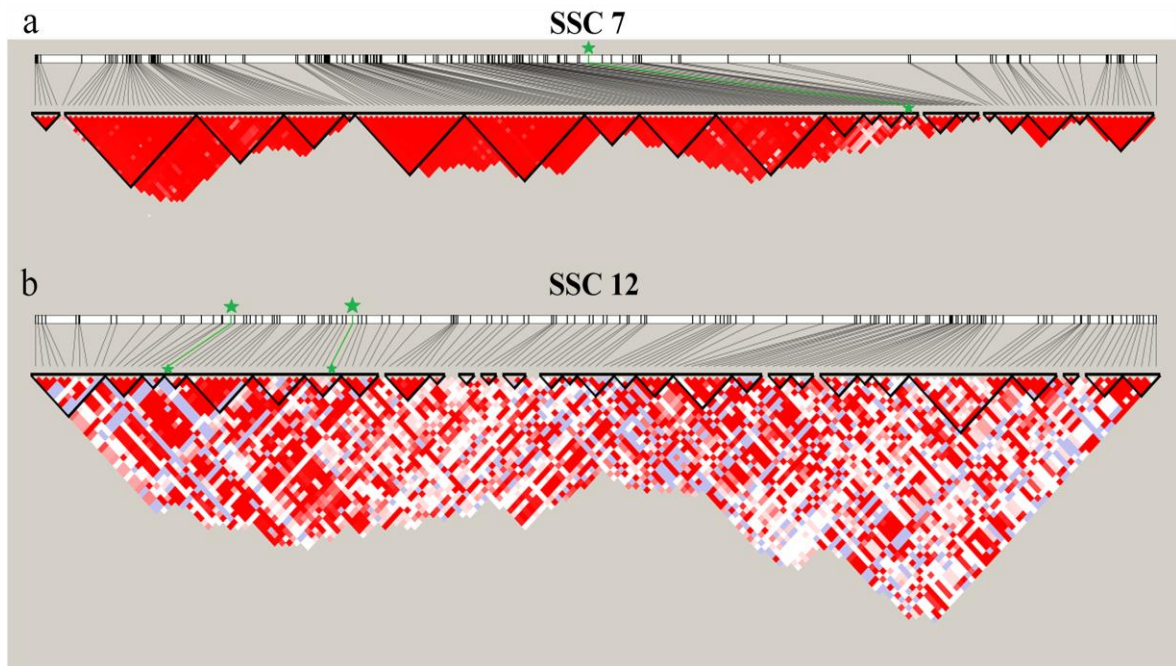

### Supplementary Fig. 5

**Plots of linkage disequilibrium (LD) pattern at two significant loci detected in this study. (a)** The LD extent plot for the 27.45-80.45 Mb region on SSC7. The green star indicates the location of the top SNP (ASGA0033714) for fatty acid metabolic traits. **(b)** The LD extent plot for the 0.4 - 8.29 Mb region on SSC12. The green stars indicate the locations of the two top SNPs (left: MARC0063090; right: ASGA0052511) identified in the conditional GWAS analysis.

**Zhang *et al.*, Supplementary Fig. 5**



| Population      | F2_LD |       |       |                | F2_AF |       |      |                | Sutai |       |        |                | Erhualian |       |      |                | Laiwu |       |      |                | DLY |       |      |                |
|-----------------|-------|-------|-------|----------------|-------|-------|------|----------------|-------|-------|--------|----------------|-----------|-------|------|----------------|-------|-------|------|----------------|-----|-------|------|----------------|
|                 | N     | Mean  | SD    | h <sup>2</sup> | N     | Mean  | SD   | h <sup>2</sup> | N     | Mean  | SD     | h <sup>2</sup> | N         | Mean  | SD   | h <sup>2</sup> | N     | Mean  | SD   | h <sup>2</sup> | N   | Mean  | SD   | h <sup>2</sup> |
| SFA             | 597   | 37.98 | 2.05  | 0.46           | 578   | 40.25 | 2.74 | 0.29           | 282   | 41.55 | 2.33   | 0.12           | 333       | 39.23 | 2.11 | 0.64           | 305   | 40.22 | 1.72 | 0.51           | 608 | 37.00 | 2.16 | 0.63           |
| MUFA            | 597   | 48.23 | 3.60  | 0.42           | 578   | 43.76 | 3.81 | 0.35           | 282   | 47.26 | 4.08   | 0.25           | 333       | 50.68 | 2.19 | 0.64           | 302   | 51.17 | 1.54 | 0.43           | 555 | 50.68 | 2.11 | 0.49           |
| PUFA            | 597   | 11.24 | 3.65  | 0.43           | 578   | 14.33 | 2.99 | 0.36           | 282   | 9.63  | 3.13   | 0.38           | 329       | 5.23  | 1.03 | 0.43           | 293   | 4.24  | 0.93 | 0.25           | 608 | 6.54  | 1.87 | 0.33           |
| UFA/SFA         | 597   | 1.57  | 0.13  | 0.51           | 578   | 1.45  | 0.17 | 0.28           | 282   | 1.38  | 0.12   | 0.22           | 329       | 1.43  | 0.12 | 0.65           | 292   | 1.38  | 0.10 | 0.50           | 555 | 1.55  | 0.14 | 0.65           |
| PUFA/MUFA       | 597   | 0.24  | 0.10  | 0.41           | 578   | 0.70  | 0.08 | 0.30           | 282   | 0.21  | 0.11   | 0.24           | 329       | 0.10  | 0.02 | 0.44           | 292   | 0.08  | 0.02 | 0.25           | 555 | 0.13  | 0.04 | 0.34           |
| MUFA/SFA        | 597   | 1.27  | 0.11  | 0.45           | 578   | 1.10  | 0.15 | 0.30           | 282   | 1.14  | 0.12   | 0.28           | 333       | 1.30  | 0.12 | 0.67           | 302   | 1.28  | 0.09 | 0.49           | 555 | 1.37  | 0.12 | 0.65           |
| PUFA/SFA        | 597   | 0.30  | 0.11  | 0.43           | 578   | 0.36  | 0.08 | 0.35           | 282   | 0.23  | 0.08   | 0.35           | 329       | 0.13  | 0.03 | 0.42           | 293   | 0.11  | 0.03 | 0.38           | 608 | 0.18  | 0.06 | 0.37           |
| N6              | --    | --    | --    | --             | --    | --    | --   | --             | 282   | 9.20  | 2.87   | 0.38           | 330       | 5.07  | 1.00 | 0.43           | 293   | 4.09  | 0.91 | 0.28           | 561 | 6.32  | 1.84 | 0.32           |
| N3              | --    | --    | --    | --             | --    | --    | --   | --             | 282   | 0.42  | 0.52   | 0.81           | 332       | 0.16  | 0.04 | 0.45           | 305   | 0.14  | 0.03 | 0.05           | 602 | 0.25  | 0.08 | 0.26           |
| N6/N3           | --    | --    | --    | --             | --    | --    | --   | --             | 282   | 31.53 | 22.01  | 0.35           | 329       | 32.13 | 2.98 | 0.44           | 293   | 29.71 | 5.20 | 0.15           | 560 | 25.46 | 5.37 | 0.00           |
| C14:1n5/C14:0   | --    | --    | --    | --             | --    | --    | --   | --             | 282   | 0.02  | 0.00   | 0.00           | 333       | 0.02  | 0.00 | 0.64           | 277   | 0.02  | 0.00 | 0.40           | 563 | 0.02  | 0.01 | 0.07           |
| C16:0/C14:0     | 597   | 22.46 | 16.26 | 0.03           | 578   | 22.47 | 2.56 | 0.28           | 282   | 17.47 | 2.38   | 0.46           | 333       | 18.95 | 1.96 | 0.65           | 305   | 19.96 | 1.37 | 0.42           | 608 | 18.30 | 1.22 | 0.47           |
| C18:0/C16:0     | 597   | 0.56  | 0.05  | 0.50           | 578   | 0.60  | 0.08 | 0.56           | 282   | 0.54  | 0.05   | 0.57           | 333       | 0.50  | 0.05 | 0.65           | 305   | 0.46  | 0.04 | 0.46           | 608 | 0.48  | 0.04 | 0.70           |
| C16:1n7/C16:0   | 597   | 0.13  | 0.02  | 0.54           | 578   | 0.07  | 0.02 | 0.37           | 282   | 0.12  | 0.03   | 0.31           | 333       | 0.14  | 0.03 | 0.73           | 305   | 0.15  | 0.02 | 0.52           | 608 | 0.16  | 0.02 | 0.74           |
| C18:1n9/C16:1n7 | 597   | 15.19 | 2.71  | 0.55           | 578   | 24.61 | 5.19 | 0.55           | 282   | 22.87 | 109.86 | 0.03           | 333       | 13.31 | 3.14 | 0.68           | 305   | 12.32 | 2.13 | 0.56           | 608 | 11.78 | 1.49 | 0.74           |
| C18:1n9/C18:0   | 597   | 3.42  | 0.44  | 0.45           | 578   | 2.90  | 0.60 | 0.30           | 282   | 3.13  | 0.44   | 0.36           | 333       | 3.72  | 0.47 | 0.70           | 305   | 3.88  | 0.41 | 0.46           | 600 | 4.06  | 0.50 | 0.62           |
| C18:3n6/C18:2n6 | 597   | 0.02  | 0.01  | 0.29           | 578   | 0.03  | 0.00 | 0.23           | 282   | 0.01  | 0.01   | 0.46           | 330       | 0.01  | 0.00 | 0.45           | 268   | 0.00  | 0.00 | 0.26           | 561 | 0.01  | 0.00 | 0.31           |
| C20:0/C18:0     | 597   | 0.02  | 0.01  | 0.49           | 578   | 0.02  | 0.00 | 0.64           | 282   | 0.02  | 0.00   | 0.29           | 333       | 0.02  | 0.00 | 0.59           | 280   | 0.02  | 0.00 | 0.50           | 608 | 0.02  | 0.00 | 0.82           |
| C20:1n9/C18:1n9 | 597   | 0.02  | 0.00  | 0.50           | 578   | 0.02  | 0.01 | 0.54           | 282   | 0.02  | 0.01   | 0.00           | 333       | 0.02  | 0.00 | 0.40           | 280   | 0.02  | 0.00 | 0.47           | 608 | 0.02  | 0.00 | 0.53           |
| C20:1n9/C20:0   | 597   | 3.67  | 1.56  | 0.21           | 578   | 3.79  | 1.16 | 0.49           | 282   | 4.02  | 10.93  | 0.00           | 333       | 3.06  | 0.60 | 0.65           | 280   | 3.94  | 0.75 | 0.62           | 608 | 4.69  | 0.81 | 0.53           |
| C20:2n6/C18:2n6 | 597   | 0.05  | 0.01  | 0.17           | 578   | 0.05  | 0.01 | 0.53           | 282   | 0.05  | 0.02   | 0.23           | 333       | 0.06  | 0.01 | 0.53           | 280   | 0.05  | 0.01 | 0.39           | 608 | 0.05  | 0.01 | 0.31           |
| C20:3n6/C18:2n6 | 597   | 0.15  | 0.05  | 0.28           | 578   | 0.01  | 0.00 | 0.15           | 282   | 0.02  | 0.02   | 0.09           | 333       | 0.02  | 0.00 | 0.55           | 280   | 0.01  | 0.00 | 0.31           | 606 | 0.02  | 0.00 | 0.17           |
| C20:3n6/C18:3n6 | 597   | 7.65  | 4.56  | 0.29           | 578   | 0.40  | 0.10 | 0.13           | 282   | 4.06  | 7.41   | 0.88           | 330       | 2.94  | 0.98 | 0.34           | 268   | 3.04  | 0.81 | 0.26           | 561 | 2.98  | 0.80 | 0.10           |
| C20:3n3/C18:3n3 | --    | --    | --    | --             | --    | --    | --   | --             | 282   | 1.07  | 2.24   | 0.29           | 332       | 0.20  | 0.04 | 0.21           | 280   | 0.23  | 0.05 | 0.37           | 602 | 0.32  | 0.12 | 0.12           |
| C20:4n6/C18:2n6 | 597   | 0.01  | 0.00  | 0.14           | 578   | 0.01  | 0.00 | 0.41           | 282   | 0.01  | 0.01   | 0.21           | 333       | 0.06  | 0.02 | 0.57           | 280   | 0.05  | 0.01 | 0.19           | 608 | 0.09  | 0.03 | 0.08           |

|                        |     |       |      |      |     |       |      |      |     |       |      |      |     |       |      |      |     |       |      |      |     |       |      |      |
|------------------------|-----|-------|------|------|-----|-------|------|------|-----|-------|------|------|-----|-------|------|------|-----|-------|------|------|-----|-------|------|------|
| <b>C20:4n6/C18:3n6</b> | 597 | 0.26  | 0.08 | 0.22 | 578 | 0.19  | 0.05 | 0.43 | 282 | 1.55  | 2.27 | 0.82 | 330 | 9.53  | 3.54 | 0.37 | 268 | 10.73 | 3.63 | 0.15 | 561 | 14.95 | 5.36 | 0.00 |
| <b>C20:4n6/C20:2n6</b> | 597 | 0.11  | 0.03 | 0.05 | 578 | 0.13  | 0.02 | 0.09 | 282 | 0.20  | 0.11 | 0.18 | 333 | 1.01  | 0.30 | 0.68 | 280 | 0.94  | 0.32 | 0.12 | 608 | 1.71  | 0.84 | 0.08 |
| <b>C20:4n6/C20:3n6</b> | 597 | 0.05  | 0.04 | 0.05 | 578 | 0.50  | 0.19 | 0.45 | 282 | 0.75  | 1.09 | 0.21 | 333 | 3.30  | 0.76 | 0.56 | 280 | 3.61  | 0.88 | 0.20 | 606 | 5.09  | 1.36 | 0.21 |
| <b>FattyAI</b>         | 597 | 0.47  | 0.04 | 0.58 | 578 | 0.50  | 0.05 | 0.35 | 282 | 0.56  | 0.08 | 0.00 | 329 | 0.54  | 0.05 | 0.66 | 292 | 0.57  | 0.04 | 0.53 | 555 | 0.51  | 0.04 | 0.63 |
| <b>FattyTI</b>         | --  | --    | --   | --   | --  | --    | --   | --   | 282 | 1.40  | 0.18 | 0.00 | 329 | 1.38  | 0.12 | 0.63 | 292 | 1.42  | 0.10 | 0.51 | 526 | 1.26  | 0.12 | 0.66 |
| <b>ACL</b>             | 597 | 17.03 | 0.25 | 0.16 | 578 | 17.18 | 0.08 | 0.29 | 282 | 17.12 | 0.18 | 0.30 | 291 | 16.54 | 0.17 | 0.57 | 292 | 16.58 | 0.12 | 0.42 | 518 | 16.41 | 0.17 | 0.12 |
| <b>DBI</b>             | 597 | 0.73  | 0.06 | 0.44 | 578 | 0.73  | 0.04 | 0.35 | 282 | 0.67  | 0.04 | 0.23 | 329 | 0.62  | 0.02 | 0.54 | 292 | 0.60  | 0.02 | 0.47 | 526 | 0.65  | 0.04 | 0.49 |
| <b>UI</b>              | 597 | 1.46  | 0.11 | 0.44 | 578 | 1.47  | 0.09 | 0.35 | 282 | 1.35  | 0.08 | 0.23 | 329 | 1.24  | 0.05 | 0.54 | 292 | 1.21  | 0.04 | 0.47 | 526 | 1.30  | 0.07 | 0.49 |

### Supplementary Table 1

Summary of phenotypic values in five pig populations. F<sub>2</sub>\_LD: *longissimus dorsi* samples in the White Duroc × Erhualian F<sub>2</sub> population; F<sub>2</sub>\_AF: abdominal fat samples in the White Duroc × Erhualian F<sub>2</sub> population.

| Trait | Chr | SNP         | Position  | P-value(-log) | Weight | Direction |
|-------|-----|-------------|-----------|---------------|--------|-----------|
| SFA   | 7   | MARC0077275 | 17049497  | 4.58          | 2260   | ----      |
| SFA   | 8   | MARC0029979 | 87866390  | 4.62          | 2261   | ----      |
| SFA   | 10  | ALGA0058420 | 39211912  | 5.13          | 2260   | +++++     |
| SFA   | 12  | MARC0085766 | 32562570  | 4.74          | 2256   | +++++     |
| SFA   | 14  | ALGA0081025 | 119955763 | 5.18          | 2194   | -+---     |
| SFA   | 14  | ASGA0066073 | 120063463 | 4.63          | 2261   | +----     |
| SFA   | 14  | ASGA0066077 | 120101898 | 6.40          | 2262   | +++++     |
| SFA   | 14  | ALGA0081039 | 120188229 | 13.21         | 2261   | +++++     |
| SFA   | 14  | ALGA0081040 | 120210617 | 5.85          | 2262   | ++++-     |
| SFA   | 14  | MARC0043866 | 120283339 | 12.76         | 2253   | ----      |
| SFA   | 14  | MARC0014536 | 120439354 | 12.99         | 2258   | +++++     |
| SFA   | 14  | ALGA0081091 | 120986865 | 14.17         | 2262   | ++++-     |
| SFA   | 14  | CASI0010164 | 121305916 | 26.78         | 2258   | +++++     |
| SFA   | 14  | ALGA0081097 | 121330920 | 15.59         | 2262   | ---++     |
| SFA   | 14  | MARC0111695 | 121418492 | 26.46         | 2262   | ----      |
| SFA   | 14  | H3GA0042070 | 121721589 | 15.62         | 2261   | +++++     |
| SFA   | 14  | ASGA0066131 | 121782540 | 5.22          | 2262   | +++++     |
| SFA   | 14  | MARC0012665 | 121885281 | 15.32         | 2260   | +++++     |
| SFA   | 14  | ASGA0066137 | 122043297 | 9.10          | 2208   | ++++-     |
| SFA   | 14  | MARC0083967 | 122323095 | 13.80         | 2262   | ++++-     |
| SFA   | 14  | ALGA0081147 | 122390223 | 14.90         | 2262   | ----      |
| SFA   | 14  | ASGA0066158 | 122427131 | 5.20          | 2262   | ---++     |
| SFA   | 14  | INRA0046735 | 122482603 | 12.47         | 2260   | ++++-     |
| SFA   | 14  | H3GA0042098 | 122667984 | 11.44         | 2253   | ----      |
| SFA   | 14  | ASGA0066162 | 122718232 | 14.67         | 2254   | ----+     |
| SFA   | 14  | ALGA0081164 | 122935134 | 5.84          | 2234   | ---+-     |
| SFA   | 14  | MARC0075113 | 122966625 | 5.61          | 2261   | ----      |
| SFA   | 14  | ASGA0066177 | 123214577 | 7.04          | 2261   | ++++-     |
| SFA   | 14  | DIAS0004744 | 123268607 | 12.83         | 2260   | +++++     |
| SFA   | 14  | MARC0031817 | 123290079 | 16.31         | 2259   | ----      |
| SFA   | 14  | ALGA0081185 | 123378986 | 7.46          | 2261   | ----+     |
| SFA   | 14  | ASGA0066203 | 123757577 | 5.15          | 2262   | +++++     |
| MUFA  | 8   | ASGA0039155 | 87740951  | 5.16          | 2204   | +++++     |
| MUFA  | 12  | ALGA0120651 | 60466900  | 4.45          | 2203   | +++++     |
| MUFA  | 14  | ALGA0081039 | 120188229 | 5.43          | 2205   | ----      |
| MUFA  | 14  | MARC0043866 | 120283339 | 4.50          | 2197   | +++++     |
| MUFA  | 14  | CASI0010164 | 121305916 | 9.52          | 2202   | ----      |
| MUFA  | 14  | ALGA0081097 | 121330920 | 5.02          | 2206   | ++++-     |
| MUFA  | 14  | MARC0111695 | 121418492 | 9.52          | 2206   | +++++     |
| MUFA  | 14  | H3GA0042070 | 121721589 | 6.87          | 2205   | ----      |
| MUFA  | 14  | MARC0012665 | 121885281 | 7.78          | 2204   | ----      |
| MUFA  | 14  | MARC0083967 | 122323095 | 4.62          | 2206   | ----+     |

|           |    |             |           |       |      |       |
|-----------|----|-------------|-----------|-------|------|-------|
| MUFA      | 14 | ALGA0081147 | 122390223 | 7.75  | 2206 | +++++ |
| MUFA      | 14 | INRA0046735 | 122482603 | 6.45  | 2204 | ----+ |
| MUFA      | 14 | H3GA0042098 | 122667984 | 5.77  | 2197 | ++++- |
| MUFA      | 14 | ASGA0066162 | 122718232 | 5.66  | 2198 | +++++ |
| MUFA      | 14 | MARC0075113 | 122966625 | 4.70  | 2205 | +++++ |
| MUFA      | 14 | DIAS0004744 | 123268607 | 6.36  | 2204 | ----  |
| MUFA      | 14 | MARC0031817 | 123290079 | 6.65  | 2203 | +++++ |
| PUFA      | 1  | ALGA0006085 | 152065923 | 4.49  | 2239 | ----  |
| PUFA      | 9  | MARC0100324 | 129407632 | 4.68  | 2246 | +++++ |
| UFA/SFA   | 3  | H3GA0010308 | 113330960 | 4.78  | 2187 | +++++ |
| UFA/SFA   | 8  | MARC0029979 | 87866390  | 4.97  | 2191 | +++++ |
| UFA/SFA   | 10 | ALGA0058420 | 39211912  | 4.49  | 2190 | ----  |
| UFA/SFA   | 14 | ALGA0081025 | 119955763 | 4.90  | 2124 | +---- |
| UFA/SFA   | 14 | ASGA0066073 | 120063463 | 4.72  | 2191 | -+--- |
| UFA/SFA   | 14 | ASGA0066077 | 120101898 | 6.76  | 2192 | ----  |
| UFA/SFA   | 14 | ALGA0081039 | 120188229 | 13.70 | 2191 | ----  |
| UFA/SFA   | 14 | ALGA0081040 | 120210617 | 6.24  | 2192 | ----+ |
| UFA/SFA   | 14 | MARC0043866 | 120283339 | 12.98 | 2183 | +++++ |
| UFA/SFA   | 14 | MARC0014536 | 120439354 | 12.09 | 2188 | ----  |
| UFA/SFA   | 14 | ALGA0081091 | 120986865 | 12.82 | 2192 | ---++ |
| UFA/SFA   | 14 | CASI0010164 | 121305916 | 24.62 | 2188 | ----  |
| UFA/SFA   | 14 | ALGA0081097 | 121330920 | 14.08 | 2192 | +++-- |
| UFA/SFA   | 14 | MARC0111695 | 121418492 | 24.78 | 2192 | +++++ |
| UFA/SFA   | 14 | H3GA0042070 | 121721589 | 15.52 | 2191 | ----  |
| UFA/SFA   | 14 | ASGA0066131 | 121782540 | 4.73  | 2192 | ---+- |
| UFA/SFA   | 14 | MARC0012665 | 121885281 | 14.78 | 2190 | ----  |
| UFA/SFA   | 14 | ASGA0066137 | 122043297 | 8.28  | 2138 | ----+ |
| UFA/SFA   | 14 | MARC0083967 | 122323095 | 12.91 | 2192 | ----  |
| UFA/SFA   | 14 | ALGA0081147 | 122390223 | 14.44 | 2192 | +++++ |
| UFA/SFA   | 14 | ASGA0066158 | 122427131 | 5.49  | 2192 | +++-- |
| UFA/SFA   | 14 | INRA0046735 | 122482603 | 13.02 | 2190 | ----  |
| UFA/SFA   | 14 | H3GA0042098 | 122667984 | 11.53 | 2183 | +++++ |
| UFA/SFA   | 14 | ASGA0066162 | 122718232 | 14.85 | 2184 | +++++ |
| UFA/SFA   | 14 | ALGA0081164 | 122935134 | 5.74  | 2164 | +++-- |
| UFA/SFA   | 14 | MARC0075113 | 122966625 | 6.23  | 2191 | +++++ |
| UFA/SFA   | 14 | ASGA0066177 | 123214577 | 7.40  | 2191 | ---++ |
| UFA/SFA   | 14 | DIAS0004744 | 123268607 | 12.42 | 2190 | ----  |
| UFA/SFA   | 14 | MARC0031817 | 123290079 | 15.34 | 2189 | +++++ |
| UFA/SFA   | 14 | ALGA0081185 | 123378986 | 7.30  | 2191 | +++++ |
| UFA/SFA   | 14 | ASGA0066203 | 123757577 | 5.25  | 2192 | ----  |
| PUFA/MUFA | 1  | ALGA0006085 | 152065923 | 4.55  | 2185 | ----  |
| PUFA/MUFA | 9  | MARC0100324 | 129407632 | 4.60  | 2192 | +++++ |
| MUFA/SFA  | 8  | MARC0029979 | 87866390  | 5.21  | 2205 | +++++ |

|             |    |             |           |       |      |       |
|-------------|----|-------------|-----------|-------|------|-------|
| MUFA/SFA    | 14 | ALGA0081025 | 119955763 | 6.14  | 2138 | +++++ |
| MUFA/SFA    | 14 | ASGA0066073 | 120063463 | 4.76  | 2205 | -+--- |
| MUFA/SFA    | 14 | ASGA0066077 | 120101898 | 7.63  | 2206 | ----  |
| MUFA/SFA    | 14 | ALGA0081039 | 120188229 | 13.49 | 2205 | ----  |
| MUFA/SFA    | 14 | ALGA0081040 | 120210617 | 7.81  | 2206 | ----+ |
| MUFA/SFA    | 14 | MARC0043866 | 120283339 | 12.19 | 2197 | +++++ |
| MUFA/SFA    | 14 | MARC0014536 | 120439354 | 11.22 | 2202 | ----  |
| MUFA/SFA    | 14 | ALGA0081091 | 120986865 | 10.44 | 2206 | ----+ |
| MUFA/SFA    | 14 | CASI0010164 | 121305916 | 22.90 | 2202 | ----  |
| MUFA/SFA    | 14 | ALGA0081097 | 121330920 | 11.95 | 2206 | +++-- |
| MUFA/SFA    | 14 | MARC0111695 | 121418492 | 23.13 | 2206 | +++++ |
| MUFA/SFA    | 14 | H3GA0042070 | 121721589 | 13.67 | 2205 | ----  |
| MUFA/SFA    | 14 | ASGA0066131 | 121782540 | 4.97  | 2206 | ---+- |
| MUFA/SFA    | 14 | MARC0012665 | 121885281 | 15.15 | 2204 | ----  |
| MUFA/SFA    | 14 | ASGA0066137 | 122043297 | 8.30  | 2152 | ----+ |
| MUFA/SFA    | 14 | MARC0083967 | 122323095 | 10.95 | 2206 | ----+ |
| MUFA/SFA    | 14 | ALGA0081147 | 122390223 | 14.91 | 2206 | +++++ |
| MUFA/SFA    | 14 | ASGA0066158 | 122427131 | 5.90  | 2206 | +++-- |
| MUFA/SFA    | 14 | INRA0046735 | 122482603 | 12.73 | 2204 | ----+ |
| MUFA/SFA    | 14 | H3GA0042098 | 122667984 | 11.30 | 2197 | +++++ |
| MUFA/SFA    | 14 | ASGA0066162 | 122718232 | 13.18 | 2198 | +++++ |
| MUFA/SFA    | 14 | ALGA0081164 | 122935134 | 6.57  | 2178 | +++-- |
| MUFA/SFA    | 14 | MARC0075113 | 122966625 | 7.40  | 2205 | +++++ |
| MUFA/SFA    | 14 | ASGA0066177 | 123214577 | 6.42  | 2205 | ---++ |
| MUFA/SFA    | 14 | DIAS0004744 | 123268607 | 12.50 | 2204 | ----  |
| MUFA/SFA    | 14 | MARC0031817 | 123290079 | 14.45 | 2203 | +++++ |
| MUFA/SFA    | 14 | ALGA0081185 | 123378986 | 7.16  | 2205 | +++++ |
| MUFA/SFA    | 14 | ASGA0066203 | 123757577 | 5.86  | 2206 | ----  |
| MUFA/SFA    | 14 | INRA0046870 | 125906500 | 5.11  | 2206 | +++++ |
| PUFA/SFA    | 9  | MARC0100324 | 129407632 | 4.69  | 2246 | +++++ |
| C16:0/C14:0 | 4  | ALGA0022796 | 8215226   | 4.60  | 2262 | +++++ |
| C16:0/C14:0 | 8  | ALGA0046233 | 7551522   | 13.02 | 2259 | ----  |
| C16:0/C14:0 | 8  | ASGA0089198 | 137006114 | 5.48  | 2260 | ----  |
| C16:0/C14:0 | 9  | ALGA0051430 | 12691365  | 6.89  | 2256 | ----  |
| C16:0/C14:0 | 9  | ASGA0041665 | 13125438  | 5.31  | 2261 | +---- |
| C16:0/C14:0 | 12 | H3GA0055340 | 79502     | 5.51  | 2262 | +++++ |
| C16:0/C14:0 | 12 | M1GA0015685 | 384380    | 8.11  | 2262 | +++++ |
| C16:0/C14:0 | 12 | MARC0091258 | 463662    | 5.94  | 2261 | -++++ |
| C16:0/C14:0 | 12 | MARC0033222 | 724868    | 4.50  | 2256 | +---- |
| C16:0/C14:0 | 12 | ASGA0089998 | 940547    | 7.14  | 2261 | ----  |
| C16:0/C14:0 | 12 | ASGA0084331 | 1169606   | 11.92 | 2258 | ----  |
| C16:0/C14:0 | 12 | ASGA0052467 | 1888177   | 4.97  | 2262 | +++++ |
| C16:0/C14:0 | 12 | MARC0058650 | 2245718   | 4.53  | 2262 | +++++ |

|               |    |             |           |       |      |       |
|---------------|----|-------------|-----------|-------|------|-------|
| C16:0/C14:0   | 12 | MARC0055936 | 3704627   | 5.33  | 2261 | ----  |
| C16:0/C14:0   | 12 | ASGA0052546 | 4118938   | 5.43  | 2258 | ----  |
| C16:0/C14:0   | 18 | ALGA0107067 | 38219323  | 6.62  | 2259 | ++++  |
| C18:0/C16:0   | 4  | ALGA0081092 | 63864176  | 7.46  | 2261 | ++++  |
| C18:0/C16:0   | 7  | ALGA0039950 | 31500144  | 5.99  | 2262 | ----  |
| C18:0/C16:0   | 7  | MARC0033464 | 35177641  | 5.32  | 2262 | ----  |
| C18:0/C16:0   | 8  | SIRI0000509 | 119727822 | 5.41  | 2260 | -+--  |
| C18:0/C16:0   | 8  | ALGA0049202 | 120104023 | 5.50  | 2257 | +--+  |
| C18:0/C16:0   | 8  | DIAS0001763 | 120553940 | 4.66  | 2262 | ++++  |
| C18:0/C16:0   | 9  | ALGA0051259 | 11340377  | 4.52  | 2261 | ++++  |
| C18:0/C16:0   | 14 | MARC0034469 | 93590454  | 5.73  | 2255 | ++++  |
| C18:0/C16:0   | 14 | ALGA0081025 | 119955763 | 5.02  | 2194 | ----  |
| C18:0/C16:0   | 14 | ASGA0066077 | 120101898 | 7.31  | 2262 | ++++  |
| C18:0/C16:0   | 14 | ALGA0081039 | 120188229 | 12.32 | 2261 | ++++  |
| C18:0/C16:0   | 14 | ALGA0081040 | 120210617 | 8.05  | 2262 | ++++  |
| C18:0/C16:0   | 14 | MARC0043866 | 120283339 | 12.30 | 2253 | ----  |
| C18:0/C16:0   | 14 | MARC0014536 | 120439354 | 13.41 | 2258 | ++++  |
| C18:0/C16:0   | 14 | ALGA0081091 | 120986865 | 16.69 | 2262 | ++++  |
| C18:0/C16:0   | 14 | CASI0010164 | 121305916 | 28.94 | 2258 | ++++  |
| C18:0/C16:0   | 14 | ALGA0081097 | 121330920 | 17.21 | 2262 | ---+  |
| C18:0/C16:0   | 14 | MARC0111695 | 121418492 | 23.84 | 2262 | ----  |
| C18:0/C16:0   | 14 | H3GA0042070 | 121721589 | 20.21 | 2261 | ++++  |
| C18:0/C16:0   | 14 | ASGA0066131 | 121782540 | 4.62  | 2262 | ++++  |
| C18:0/C16:0   | 14 | MARC0012665 | 121885281 | 13.48 | 2260 | ++++  |
| C18:0/C16:0   | 14 | ASGA0066137 | 122043297 | 13.34 | 2208 | ++++  |
| C18:0/C16:0   | 14 | MARC0083967 | 122323095 | 12.98 | 2262 | ++++  |
| C18:0/C16:0   | 14 | ALGA0081147 | 122390223 | 13.09 | 2262 | ----  |
| C18:0/C16:0   | 14 | ASGA0066158 | 122427131 | 7.50  | 2262 | ---+  |
| C18:0/C16:0   | 14 | INRA0046735 | 122482603 | 11.23 | 2260 | ++++  |
| C18:0/C16:0   | 14 | H3GA0042098 | 122667984 | 9.74  | 2253 | ----  |
| C18:0/C16:0   | 14 | ASGA0066162 | 122718232 | 13.78 | 2254 | ----  |
| C18:0/C16:0   | 14 | ALGA0081164 | 122935134 | 5.60  | 2234 | ---+  |
| C18:0/C16:0   | 14 | MARC0075113 | 122966625 | 6.99  | 2261 | ----  |
| C18:0/C16:0   | 14 | ASGA0066177 | 123214577 | 8.18  | 2261 | +++-- |
| C18:0/C16:0   | 14 | DIAS0004744 | 123268607 | 11.35 | 2260 | ++++  |
| C18:0/C16:0   | 14 | MARC0031817 | 123290079 | 15.71 | 2259 | ----  |
| C16:1n7/C16:0 | 7  | M1GA0009842 | 31800221  | 5.26  | 2258 | ----  |
| C16:1n7/C16:0 | 8  | SIRI0000509 | 119727822 | 10.10 | 2260 | ++++  |
| C16:1n7/C16:0 | 8  | H3GA0025322 | 119942184 | 4.62  | 2262 | ++++  |
| C16:1n7/C16:0 | 8  | ALGA0049202 | 120104023 | 6.57  | 2257 | ---+  |
| C16:1n7/C16:0 | 8  | DIAS0001763 | 120553940 | 5.52  | 2262 | ----  |
| C16:1n7/C16:0 | 8  | ALGA0049249 | 120972820 | 5.00  | 2261 | ++++  |
| C16:1n7/C16:0 | 9  | ALGA0051253 | 11488056  | 5.37  | 2262 | ++++  |

|                 |    |             |           |       |      |       |
|-----------------|----|-------------|-----------|-------|------|-------|
| C16:1n7/C16:0   | 9  | ASGA0041538 | 11836128  | 7.24  | 2242 | +++++ |
| C16:1n7/C16:0   | 9  | ASGA0041570 | 11950214  | 5.23  | 2262 | +++++ |
| C16:1n7/C16:0   | 9  | ASGA0041665 | 13125438  | 5.37  | 2261 | +++++ |
| C16:1n7/C16:0   | 13 | MARC0097442 | 34967812  | 4.94  | 2260 | ----  |
| C16:1n7/C16:0   | 14 | ALGA0081025 | 119955763 | 4.86  | 2194 | +++++ |
| C16:1n7/C16:0   | 14 | ALGA0081039 | 120188229 | 7.68  | 2261 | ----  |
| C16:1n7/C16:0   | 14 | ALGA0081040 | 120210617 | 4.84  | 2262 | ----+ |
| C16:1n7/C16:0   | 14 | MARC0043866 | 120283339 | 7.60  | 2253 | +++++ |
| C16:1n7/C16:0   | 14 | MARC0014536 | 120439354 | 6.04  | 2258 | ----  |
| C16:1n7/C16:0   | 14 | ALGA0081091 | 120986865 | 8.21  | 2262 | ----+ |
| C16:1n7/C16:0   | 14 | CASI0010164 | 121305916 | 16.21 | 2258 | ----  |
| C16:1n7/C16:0   | 14 | ALGA0081097 | 121330920 | 8.86  | 2262 | +++-- |
| C16:1n7/C16:0   | 14 | MARC0111695 | 121418492 | 12.58 | 2262 | +++++ |
| C16:1n7/C16:0   | 14 | H3GA0042070 | 121721589 | 8.51  | 2261 | ----  |
| C16:1n7/C16:0   | 14 | ASGA0066131 | 121782540 | 4.90  | 2262 | ----  |
| C16:1n7/C16:0   | 14 | MARC0012665 | 121885281 | 9.23  | 2260 | ----  |
| C16:1n7/C16:0   | 14 | ASGA0066137 | 122043297 | 6.86  | 2208 | ----+ |
| C16:1n7/C16:0   | 14 | MARC0083967 | 122323095 | 7.16  | 2262 | ----+ |
| C16:1n7/C16:0   | 14 | ALGA0081147 | 122390223 | 9.37  | 2262 | +++++ |
| C16:1n7/C16:0   | 14 | ASGA0066158 | 122427131 | 4.53  | 2262 | +++++ |
| C16:1n7/C16:0   | 14 | INRA0046735 | 122482603 | 7.93  | 2260 | ----+ |
| C16:1n7/C16:0   | 14 | H3GA0042098 | 122667984 | 6.78  | 2253 | ++++- |
| C16:1n7/C16:0   | 14 | ASGA0066162 | 122718232 | 9.03  | 2254 | ++++- |
| C16:1n7/C16:0   | 14 | ALGA0081164 | 122935134 | 4.53  | 2234 | +++++ |
| C16:1n7/C16:0   | 14 | MARC0075113 | 122966625 | 5.05  | 2261 | +++++ |
| C16:1n7/C16:0   | 14 | ASGA0066177 | 123214577 | 4.75  | 2261 | ---++ |
| C16:1n7/C16:0   | 14 | DIAS0004744 | 123268607 | 8.19  | 2260 | ----  |
| C16:1n7/C16:0   | 14 | MARC0031817 | 123290079 | 8.91  | 2259 | +++++ |
| C18:1n9/C16:1n7 | 7  | ALGA0039950 | 31500144  | 5.11  | 2262 | ----  |
| C18:1n9/C16:1n7 | 7  | M1GA0009842 | 31800221  | 5.38  | 2258 | +---- |
| C18:1n9/C16:1n7 | 8  | ALGA0122904 | 109553065 | 5.50  | 2261 | +++++ |
| C18:1n9/C16:1n7 | 8  | ALGA0049122 | 117456463 | 5.07  | 2262 | ++++- |
| C18:1n9/C16:1n7 | 8  | ALGA0118007 | 119428925 | 4.55  | 2262 | +++++ |
| C18:1n9/C16:1n7 | 8  | SIRI0000509 | 119727822 | 18.28 | 2260 | ----  |
| C18:1n9/C16:1n7 | 8  | INRA0030422 | 119851321 | 8.25  | 2261 | +---- |
| C18:1n9/C16:1n7 | 8  | H3GA0025322 | 119942184 | 7.42  | 2262 | ----  |
| C18:1n9/C16:1n7 | 8  | ALGA0049202 | 120104023 | 11.16 | 2257 | +++++ |
| C18:1n9/C16:1n7 | 8  | ASGA0091658 | 120254298 | 6.34  | 2262 | +++++ |
| C18:1n9/C16:1n7 | 8  | DIAS0001763 | 120553940 | 11.36 | 2262 | +++++ |
| C18:1n9/C16:1n7 | 8  | CASI0008396 | 120736390 | 5.47  | 2199 | ---+- |
| C18:1n9/C16:1n7 | 8  | ALGA0049249 | 120972820 | 8.48  | 2261 | ----  |
| C18:1n9/C16:1n7 | 8  | ALGA0049269 | 121743168 | 4.73  | 2261 | +++++ |
| C18:1n9/C16:1n7 | 8  | ALGA0049404 | 128842533 | 6.39  | 2242 | ---+- |

|                 |    |             |           |       |      |       |
|-----------------|----|-------------|-----------|-------|------|-------|
| C18:1n9/C16:1n7 | 9  | ALGA0051124 | 10075047  | 5.28  | 2260 | +++++ |
| C18:1n9/C16:1n7 | 9  | ALGA0051253 | 11488056  | 4.82  | 2262 | ----  |
| C18:1n9/C16:1n7 | 9  | ASGA0041538 | 11836128  | 7.04  | 2242 | ----  |
| C18:1n9/C16:1n7 | 9  | ASGA0041570 | 11950214  | 5.80  | 2262 | ----  |
| C18:1n9/C16:1n7 | 9  | ASGA0041665 | 13125438  | 8.01  | 2261 | ----  |
| C18:1n9/C16:1n7 | 9  | ASGA0041763 | 14350832  | 4.58  | 2262 | +---- |
| C18:1n9/C16:1n7 | 9  | ALGA0051570 | 14512022  | 6.59  | 2262 | ----  |
| C18:1n9/C16:1n7 | 12 | ASGA0084331 | 1169606   | 4.83  | 2258 | -+--- |
| C18:1n9/C16:1n7 | 12 | ASGA0052791 | 7935301   | 4.73  | 2234 | -+--- |
| C18:1n9/C16:1n7 | 14 | CASI0010164 | 121305916 | 6.55  | 2258 | +++++ |
| C18:1n9/C18:0   | 4  | ALGA0081092 | 63864176  | 5.96  | 2253 | ----+ |
| C18:1n9/C18:0   | 8  | MARC0029979 | 87866390  | 4.63  | 2253 | +++++ |
| C18:1n9/C18:0   | 10 | ALGA0058420 | 39211912  | 4.50  | 2252 | ----  |
| C18:1n9/C18:0   | 14 | ASGA0091963 | 118732842 | 4.89  | 2253 | +++-- |
| C18:1n9/C18:0   | 14 | CASI0007888 | 119514048 | 5.15  | 2253 | -+-+- |
| C18:1n9/C18:0   | 14 | ALGA0081025 | 119955763 | 7.25  | 2186 | +++++ |
| C18:1n9/C18:0   | 14 | ASGA0066073 | 120063463 | 5.36  | 2253 | -+--- |
| C18:1n9/C18:0   | 14 | ASGA0066077 | 120101898 | 9.49  | 2254 | ----  |
| C18:1n9/C18:0   | 14 | ALGA0081039 | 120188229 | 16.38 | 2253 | ----  |
| C18:1n9/C18:0   | 14 | ALGA0081040 | 120210617 | 9.98  | 2254 | ----+ |
| C18:1n9/C18:0   | 14 | MARC0043866 | 120283339 | 15.41 | 2245 | +++++ |
| C18:1n9/C18:0   | 14 | MARC0014536 | 120439354 | 15.28 | 2250 | ----  |
| C18:1n9/C18:0   | 14 | ALGA0081091 | 120986865 | 15.48 | 2254 | ----+ |
| C18:1n9/C18:0   | 14 | CASI0010164 | 121305916 | 32.15 | 2250 | ----  |
| C18:1n9/C18:0   | 14 | ALGA0081097 | 121330920 | 18.25 | 2254 | ++++- |
| C18:1n9/C18:0   | 14 | MARC0111695 | 121418492 | 29.42 | 2254 | +++++ |
| C18:1n9/C18:0   | 14 | H3GA0042070 | 121721589 | 20.54 | 2253 | ----  |
| C18:1n9/C18:0   | 14 | ASGA0066131 | 121782540 | 6.28  | 2254 | ----  |
| C18:1n9/C18:0   | 14 | MARC0012665 | 121885281 | 18.51 | 2252 | ----  |
| C18:1n9/C18:0   | 14 | ASGA0066137 | 122043297 | 12.74 | 2200 | ----+ |
| C18:1n9/C18:0   | 14 | MARC0083967 | 122323095 | 14.80 | 2254 | ----+ |
| C18:1n9/C18:0   | 14 | ALGA0081147 | 122390223 | 18.14 | 2254 | +++++ |
| C18:1n9/C18:0   | 14 | ASGA0066158 | 122427131 | 8.00  | 2254 | +++++ |
| C18:1n9/C18:0   | 14 | INRA0046735 | 122482603 | 15.32 | 2252 | ----+ |
| C18:1n9/C18:0   | 14 | H3GA0042098 | 122667984 | 13.59 | 2245 | ++++- |
| C18:1n9/C18:0   | 14 | ASGA0066162 | 122718232 | 16.81 | 2246 | ++++- |
| C18:1n9/C18:0   | 14 | ALGA0081164 | 122935134 | 7.79  | 2226 | +++++ |
| C18:1n9/C18:0   | 14 | MARC0075113 | 122966625 | 8.80  | 2253 | +++++ |
| C18:1n9/C18:0   | 14 | ASGA0066177 | 123214577 | 8.63  | 2253 | ---++ |
| C18:1n9/C18:0   | 14 | DIAS0004744 | 123268607 | 15.42 | 2252 | ----  |
| C18:1n9/C18:0   | 14 | MARC0031817 | 123290079 | 18.96 | 2251 | +++++ |
| C18:1n9/C18:0   | 14 | ALGA0081185 | 123378986 | 7.23  | 2253 | ++++- |
| C18:1n9/C18:0   | 14 | DIAS0001139 | 123692288 | 4.50  | 2253 | ----+ |



|               |    |             |           |       |      |       |
|---------------|----|-------------|-----------|-------|------|-------|
| C18:1n9/C18:0 | 14 | ASGA0066203 | 123757577 | 5.40  | 2254 | ----  |
| C18:1n9/C18:0 | 14 | INRA0046870 | 125906500 | 4.67  | 2254 | +++++ |
| C20:0/C18:0   | 16 | ASGA0072592 | 22691355  | 5.07  | 2221 | ----  |
| C20:0/C18:0   | 16 | ASGA0072659 | 24615470  | 4.85  | 2223 | +++++ |
| C20:0/C18:0   | 16 | H3GA0046313 | 25329699  | 6.79  | 2235 | +++++ |
| C20:0/C18:0   | 16 | DRGA0015980 | 25960781  | 4.61  | 2236 | +++++ |
| C20:0/C18:0   | 16 | ASGA0072743 | 26247215  | 7.38  | 2232 | ----  |
| C20:0/C18:0   | 16 | ASGA0072755 | 26444110  | 4.74  | 2226 | ----+ |
| C20:0/C18:0   | 16 | M1GA0020968 | 27972337  | 4.67  | 2237 | ----+ |
| C20:0/C18:0   | 16 | ASGA0096846 | 28409425  | 5.82  | 2237 | --+-  |
| C20:0/C18:0   | 16 | ALGA0107886 | 28627959  | 4.58  | 2237 | +++++ |
| C20:0/C18:0   | 16 | DIAS0002738 | 29568619  | 5.48  | 2230 | ----  |
| C20:0/C18:0   | 16 | H3GA0046366 | 29952113  | 5.51  | 2237 | +++++ |
| C20:0/C18:0   | 16 | MARC0013435 | 30289787  | 4.57  | 2215 | --+-  |
| C20:0/C18:0   | 16 | DRGA0016027 | 30515922  | 9.08  | 2235 | +++++ |
| C20:0/C18:0   | 16 | MARC0032144 | 30669371  | 7.30  | 2237 | ++++- |
| C20:0/C18:0   | 16 | H3GA0046376 | 30709921  | 5.11  | 2232 | +++++ |
| C20:0/C18:0   | 16 | ASGA0084351 | 30956011  | 9.14  | 2236 | +++++ |
| C20:0/C18:0   | 16 | MARC0112978 | 30967634  | 5.54  | 2236 | ----  |
| C20:0/C18:0   | 16 | ALGA0090009 | 31016837  | 7.38  | 2235 | ----  |
| C20:0/C18:0   | 16 | ALGA0090017 | 31103652  | 5.15  | 2237 | ----+ |
| C20:0/C18:0   | 16 | ALGA0090018 | 31129915  | 10.94 | 2235 | ----  |
| C20:0/C18:0   | 16 | ALGA0090020 | 31213359  | 6.17  | 2232 | ++++- |
| C20:0/C18:0   | 16 | ALGA0107417 | 31684786  | 5.21  | 2235 | +---- |
| C20:0/C18:0   | 16 | ALGA0105400 | 31856522  | 5.32  | 2237 | ++++- |
| C20:0/C18:0   | 16 | DRGA0016047 | 31961254  | 5.85  | 2237 | ----+ |
| C20:0/C18:0   | 16 | ALGA0090076 | 32979912  | 7.65  | 2237 | ----  |
| C20:0/C18:0   | 16 | MARC0020510 | 33672880  | 13.48 | 2236 | +++++ |
| C20:0/C18:0   | 16 | ALGA0090112 | 33905749  | 11.37 | 2236 | ----  |
| C20:0/C18:0   | 16 | ALGA0090119 | 34003949  | 6.00  | 2237 | ++++- |
| C20:0/C18:0   | 16 | ALGA0090125 | 34056662  | 9.81  | 2236 | +++++ |
| C20:0/C18:0   | 16 | ALGA0090122 | 34122397  | 10.27 | 2237 | +++++ |
| C20:0/C18:0   | 16 | CASI0008095 | 34194345  | 10.17 | 2236 | +++++ |
| C20:0/C18:0   | 16 | ASGA0072949 | 34715842  | 5.58  | 2237 | -+--- |
| C20:0/C18:0   | 16 | ASGA0095837 | 35014537  | 5.33  | 2235 | ----  |
| C20:0/C18:0   | 16 | ASGA0099845 | 35035130  | 5.33  | 2237 | +++++ |
| C20:0/C18:0   | 16 | ASGA0072968 | 35190026  | 15.70 | 2225 | ----  |
| C20:0/C18:0   | 16 | ALGA0090171 | 35212148  | 10.23 | 2234 | +++++ |
| C20:0/C18:0   | 16 | DRGA0016089 | 35289193  | 14.38 | 2236 | ----  |
| C20:0/C18:0   | 16 | ALGA0090177 | 35333101  | 8.21  | 2236 | +++++ |
| C20:0/C18:0   | 16 | ASGA0073002 | 35661077  | 13.16 | 2227 | +++++ |
| C20:0/C18:0   | 16 | ALGA0090229 | 35839844  | 5.41  | 2237 | +++++ |
| C20:0/C18:0   | 16 | H3GA0046461 | 36289858  | 4.81  | 2236 | ----  |

|             |    |             |          |       |      |       |
|-------------|----|-------------|----------|-------|------|-------|
| C20:0/C18:0 | 16 | ALGA0090273 | 36472679 | 7.25  | 2221 | +++++ |
| C20:0/C18:0 | 16 | ALGA0090266 | 36506690 | 11.62 | 2236 | ----  |
| C20:0/C18:0 | 16 | ALGA0116942 | 36852067 | 6.08  | 2184 | +---+ |
| C20:0/C18:0 | 16 | MARC0027943 | 36933143 | 4.62  | 2237 | ---+- |
| C20:0/C18:0 | 16 | ASGA0073070 | 37408125 | 4.79  | 2222 | +---+ |
| C20:0/C18:0 | 16 | M1GA0020993 | 37423396 | 8.65  | 2233 | --+-  |
| C20:0/C18:0 | 16 | ASGA0073065 | 37584102 | 4.71  | 2237 | ++++- |
| C20:0/C18:0 | 16 | ALGA0112710 | 37673844 | 8.89  | 2237 | -+--- |
| C20:0/C18:0 | 16 | M1GA0020996 | 38260722 | 10.59 | 2236 | +---- |
| C20:0/C18:0 | 16 | DRGA0016119 | 38367050 | 5.78  | 2213 | +---- |
| C20:0/C18:0 | 16 | ASGA0097154 | 38383883 | 4.64  | 2237 | +---+ |
| C20:0/C18:0 | 16 | MARC0013760 | 38472566 | 5.23  | 2224 | +++++ |
| C20:0/C18:0 | 16 | ALGA0090355 | 38745958 | 12.71 | 2236 | +++++ |
| C20:0/C18:0 | 16 | DRGA0016122 | 38814746 | 9.04  | 2237 | ++--+ |
| C20:0/C18:0 | 16 | ALGA0090370 | 38964196 | 7.64  | 2237 | +++++ |
| C20:0/C18:0 | 16 | ALGA0090377 | 39171047 | 10.76 | 2229 | ----  |
| C20:0/C18:0 | 16 | ALGA0090392 | 40150018 | 11.04 | 2237 | +++++ |
| C20:0/C18:0 | 16 | ALGA0090412 | 40783785 | 4.46  | 2237 | -+--- |
| C20:0/C18:0 | 16 | MARC0084747 | 40932270 | 33.94 | 2237 | +++++ |
| C20:0/C18:0 | 16 | ALGA0090426 | 41305472 | 19.94 | 2237 | ----+ |
| C20:0/C18:0 | 16 | ALGA0090423 | 41393886 | 13.11 | 2236 | --+-  |
| C20:0/C18:0 | 16 | ALGA0090435 | 41627410 | 15.14 | 2233 | +++++ |
| C20:0/C18:0 | 16 | ALGA0090469 | 42269129 | 20.52 | 2237 | +++++ |
| C20:0/C18:0 | 16 | ALGA0090487 | 43093614 | 12.69 | 2237 | ++++- |
| C20:0/C18:0 | 16 | ASGA0073192 | 43402965 | 13.79 | 2237 | ---++ |
| C20:0/C18:0 | 16 | DRGA0016154 | 43516213 | 28.52 | 2215 | +++++ |
| C20:0/C18:0 | 16 | DRGA0016155 | 43534471 | 51.47 | 2237 | +++++ |
| C20:0/C18:0 | 16 | MARC0051739 | 44429692 | 32.62 | 2237 | ---+- |
| C20:0/C18:0 | 16 | ASGA0073222 | 44919236 | 16.17 | 2237 | ++++- |
| C20:0/C18:0 | 16 | DRGA0016166 | 45154456 | 22.77 | 2236 | +++++ |
| C20:0/C18:0 | 16 | DRGA0016169 | 45313348 | 19.81 | 2236 | ++++- |
| C20:0/C18:0 | 16 | ALGA0090519 | 45576077 | 7.93  | 2237 | ++++- |
| C20:0/C18:0 | 16 | DRGA0016176 | 46066010 | 22.75 | 2237 | ++++- |
| C20:0/C18:0 | 16 | ASGA0097650 | 46602679 | 6.09  | 2237 | ----  |
| C20:0/C18:0 | 16 | ASGA0073240 | 46868015 | 6.36  | 2215 | +++++ |
| C20:0/C18:0 | 16 | ASGA0073242 | 46893077 | 16.44 | 2236 | ----  |
| C20:0/C18:0 | 16 | SIRI0000384 | 47011906 | 20.53 | 2237 | ----  |
| C20:0/C18:0 | 16 | MARC0026216 | 47630018 | 8.48  | 2236 | +++++ |
| C20:0/C18:0 | 16 | ASGA0073252 | 47650300 | 8.17  | 2210 | +++++ |
| C20:0/C18:0 | 16 | ASGA0073269 | 48069505 | 4.69  | 2236 | -+--- |
| C20:0/C18:0 | 16 | ASGA0073261 | 48130360 | 10.16 | 2232 | +++++ |
| C20:0/C18:0 | 16 | ASGA0073272 | 48203983 | 43.13 | 2235 | +++++ |
| C20:0/C18:0 | 16 | MARC0093848 | 48917468 | 5.15  | 2236 | ----+ |

|                 |    |             |          |       |      |       |
|-----------------|----|-------------|----------|-------|------|-------|
| C20:0/C18:0     | 16 | DRGA0016198 | 48972181 | 6.11  | 2237 | ---+- |
| C20:0/C18:0     | 16 | ALGA0090620 | 49083460 | 9.72  | 2236 | ++++- |
| C20:0/C18:0     | 16 | MARC0098527 | 49178924 | 7.46  | 2237 | +++++ |
| C20:0/C18:0     | 16 | ASGA0084765 | 49185777 | 15.32 | 2237 | +++++ |
| C20:0/C18:0     | 16 | ALGA0090646 | 50417558 | 6.03  | 2237 | ++++- |
| C20:0/C18:0     | 16 | ALGA0090652 | 50786940 | 13.84 | 2236 | ----+ |
| C20:0/C18:0     | 16 | ALGA0090674 | 51865432 | 12.41 | 2236 | +++++ |
| C20:0/C18:0     | 16 | ISU10000643 | 51990539 | 7.16  | 2237 | ----  |
| C20:0/C18:0     | 16 | M1GA0021013 | 52012266 | 7.41  | 2235 | +++++ |
| C20:0/C18:0     | 16 | H3GA0046599 | 52206927 | 5.76  | 2236 | +++++ |
| C20:0/C18:0     | 16 | ASGA0073361 | 52416884 | 6.09  | 2226 | ---+- |
| C20:0/C18:0     | 16 | MARC0049832 | 52439349 | 6.86  | 2236 | --+-  |
| C20:0/C18:0     | 16 | ASGA0090510 | 53481413 | 5.76  | 2234 | +++++ |
| C20:0/C18:0     | 16 | ALGA0121984 | 53501437 | 5.72  | 2214 | +++++ |
| C20:0/C18:0     | 16 | ASGA0086954 | 53505277 | 4.57  | 2228 | +++++ |
| C20:0/C18:0     | 16 | H3GA0046623 | 54031268 | 4.80  | 2237 | +++++ |
| C20:0/C18:0     | 16 | ALGA0090725 | 54325792 | 6.98  | 2237 | +++++ |
| C20:0/C18:0     | 16 | ASGA0073382 | 55361884 | 6.42  | 2237 | +++++ |
| C20:0/C18:0     | 16 | MARC0005681 | 55691446 | 9.06  | 2231 | ---+- |
| C20:0/C18:0     | 16 | MARC0008457 | 55767594 | 4.58  | 2233 | ----  |
| C20:0/C18:0     | 16 | ASGA0073404 | 55993053 | 6.37  | 2237 | ---+- |
| C20:0/C18:0     | 16 | ALGA0090772 | 56916532 | 4.96  | 2237 | +++++ |
| C20:0/C18:0     | 16 | H3GA0046657 | 56936736 | 6.44  | 2237 | ----  |
| C20:0/C18:0     | 16 | H3GA0046765 | 59605947 | 5.19  | 2187 | ++++- |
| C20:0/C18:0     | 16 | ASGA0073613 | 60183758 | 4.63  | 2230 | +++++ |
| C20:0/C18:0     | 16 | ALGA0108312 | 60401023 | 4.88  | 2237 | ----  |
| C20:0/C18:0     | 16 | ASGA0073651 | 61995301 | 4.61  | 2237 | ++++- |
| C20:0/C18:0     | 16 | DRGA0016251 | 63229295 | 4.66  | 2231 | ----  |
| C20:0/C18:0     | 16 | MARC0010374 | 67857563 | 5.33  | 2218 | +++++ |
| C20:0/C18:0     | 16 | ASGA0073800 | 69095599 | 5.83  | 2236 | ----  |
| C20:0/C18:0     | 16 | ASGA0073815 | 69294616 | 5.36  | 2236 | +++++ |
| C20:0/C18:0     | 16 | ASGA0073817 | 69305036 | 4.71  | 2216 | +++++ |
| C20:0/C18:0     | 16 | MARC0109000 | 69503193 | 5.66  | 2237 | +++++ |
| C20:1n9/C18:1n9 | 7  | ASGA0032266 | 32543114 | 8.10  | 2220 | ----  |
| C20:1n9/C18:1n9 | 7  | ASGA0032270 | 32786027 | 6.56  | 2234 | +++++ |
| C20:1n9/C18:1n9 | 7  | ASGA0032276 | 32808311 | 8.19  | 2237 | +++++ |
| C20:1n9/C18:1n9 | 7  | MARC0074480 | 42999450 | 4.62  | 2236 | ----+ |
| C20:1n9/C18:1n9 | 7  | ALGA0040856 | 43166101 | 4.57  | 2230 | ++++- |
| C20:1n9/C18:1n9 | 7  | DRGA0007537 | 48920722 | 4.92  | 2235 | ----  |
| C20:1n9/C18:1n9 | 7  | ALGA0041169 | 49071381 | 7.74  | 2230 | ----  |
| C20:1n9/C18:1n9 | 7  | MARC0083963 | 50138934 | 4.76  | 2237 | +++++ |
| C20:1n9/C18:1n9 | 7  | ALGA0041338 | 50844200 | 6.38  | 2233 | --+-  |
| C20:1n9/C18:1n9 | 7  | ALGA0041419 | 51894605 | 5.13  | 2237 | +++++ |

|                 |    |             |           |      |      |       |
|-----------------|----|-------------|-----------|------|------|-------|
| C20:1n9/C18:1n9 | 7  | ALGA0041464 | 52279313  | 8.69 | 2234 | ----+ |
| C20:1n9/C18:1n9 | 7  | MARC0034834 | 53102034  | 8.06 | 2237 | ----+ |
| C20:1n9/C18:1n9 | 7  | ALGA0041580 | 53559770  | 6.73 | 2237 | +++++ |
| C20:1n9/C18:1n9 | 7  | ALGA0041598 | 53707250  | 9.56 | 2235 | ----  |
| C20:1n9/C18:1n9 | 7  | H3GA0055560 | 54997566  | 6.13 | 2180 | +++++ |
| C20:1n9/C18:1n9 | 7  | M1GA0010388 | 55681553  | 4.63 | 2234 | +++++ |
| C20:1n9/C18:1n9 | 7  | ALGA0041948 | 55878376  | 5.20 | 2235 | -+++  |
| C20:1n9/C18:1n9 | 7  | ALGA0041977 | 56166104  | 8.13 | 2212 | +---- |
| C20:1n9/C18:1n9 | 7  | ASGA0034040 | 56199605  | 6.80 | 2237 | +---- |
| C20:1n9/C18:1n9 | 7  | ASGA0034043 | 56215710  | 6.63 | 2237 | ---+- |
| C20:1n9/C18:1n9 | 7  | ASGA0034046 | 56230077  | 4.51 | 2236 | ----  |
| C20:1n9/C18:1n9 | 7  | INRA0025982 | 56849029  | 5.06 | 2235 | +++++ |
| C20:1n9/C18:1n9 | 7  | H3GA0021788 | 56888377  | 5.20 | 2237 | -+--- |
| C20:1n9/C18:1n9 | 7  | ASGA0034092 | 56916492  | 5.84 | 2236 | ----  |
| C20:1n9/C18:1n9 | 7  | ALGA0042183 | 59039109  | 4.55 | 2236 | +++++ |
| C20:1n9/C18:1n9 | 7  | ASGA0034251 | 62438211  | 5.07 | 2237 | ----  |
| C20:1n9/C18:1n9 | 7  | MARC0067183 | 70357011  | 4.68 | 2230 | +---- |
| C20:1n9/C18:1n9 | 7  | ALGA0042424 | 70401988  | 4.80 | 2237 | +++++ |
| C20:1n9/C18:1n9 | 7  | ALGA0042516 | 74587760  | 4.72 | 2236 | +++++ |
| C20:1n9/C18:1n9 | 7  | ALGA0042635 | 80902468  | 4.86 | 2236 | ----+ |
| C20:1n9/C18:1n9 | 7  | ALGA0043757 | 99048843  | 5.00 | 2235 | ----  |
| C20:1n9/C18:1n9 | 7  | ALGA0114746 | 134540651 | 8.97 | 2234 | +---+ |
| C20:1n9/C18:1n9 | 16 | MARC0020510 | 33672880  | 5.08 | 2236 | +++++ |
| C20:1n9/C18:1n9 | 16 | MARC0084747 | 40932270  | 6.58 | 2237 | +++++ |
| C20:1n9/C18:1n9 | 16 | DRGA0016155 | 43534471  | 4.56 | 2237 | +++++ |
| C20:1n9/C20:0   | 7  | ASGA0032266 | 32543114  | 4.53 | 2220 | ----  |
| C20:1n9/C20:0   | 7  | ASGA0032276 | 32808311  | 6.32 | 2237 | +++++ |
| C20:1n9/C20:0   | 7  | MARC0083963 | 50138934  | 6.37 | 2237 | +---- |
| C20:1n9/C20:0   | 7  | ALGA0041338 | 50844200  | 4.60 | 2233 | ----  |
| C20:1n9/C20:0   | 7  | ALGA0041464 | 52279313  | 4.78 | 2234 | ----+ |
| C20:1n9/C20:0   | 7  | ASGA0033595 | 52462626  | 5.03 | 2187 | +++++ |
| C20:1n9/C20:0   | 7  | ALGA0041948 | 55878376  | 6.41 | 2235 | --+-  |
| C20:1n9/C20:0   | 7  | H3GA0021739 | 55905779  | 5.76 | 2232 | +++++ |
| C20:1n9/C20:0   | 7  | ASGA0034040 | 56199605  | 4.45 | 2237 | +---- |
| C20:1n9/C20:0   | 7  | ALGA0114746 | 134540651 | 7.12 | 2234 | +---+ |
| C20:1n9/C20:0   | 14 | ASGA0061202 | 11325047  | 5.53 | 2237 | ---+- |
| C20:1n9/C20:0   | 14 | CASI0010164 | 121305916 | 5.50 | 2233 | ----  |
| C20:1n9/C20:0   | 14 | MARC0111695 | 121418492 | 6.60 | 2237 | +++++ |
| C20:1n9/C20:0   | 16 | ASGA0103355 | 20271819  | 4.46 | 2236 | +++++ |
| C20:1n9/C20:0   | 16 | ASGA0072592 | 22691355  | 4.91 | 2221 | +---- |
| C20:1n9/C20:0   | 16 | ALGA0090009 | 31016837  | 4.60 | 2235 | +---+ |
| C20:1n9/C20:0   | 16 | ALGA0090112 | 33905749  | 4.88 | 2236 | +++++ |
| C20:1n9/C20:0   | 16 | ASGA0073002 | 35661077  | 4.55 | 2227 | ---+- |

|                 |    |             |           |       |      |       |
|-----------------|----|-------------|-----------|-------|------|-------|
| C20:1n9/C20:0   | 16 | ALGA0090273 | 36472679  | 5.46  | 2221 | ---+- |
| C20:1n9/C20:0   | 16 | ALGA0112710 | 37673844  | 4.89  | 2237 | +---+ |
| C20:1n9/C20:0   | 16 | ALGA0090355 | 38745958  | 7.00  | 2236 | ---+- |
| C20:1n9/C20:0   | 16 | DRGA0016122 | 38814746  | 5.58  | 2237 | ---+- |
| C20:1n9/C20:0   | 16 | MARC0084747 | 40932270  | 10.85 | 2237 | ----  |
| C20:1n9/C20:0   | 16 | ALGA0090426 | 41305472  | 4.94  | 2237 | +++-- |
| C20:1n9/C20:0   | 16 | ALGA0090423 | 41393886  | 4.46  | 2236 | +++-- |
| C20:1n9/C20:0   | 16 | ALGA0090435 | 41627410  | 4.61  | 2233 | ----+ |
| C20:1n9/C20:0   | 16 | ALGA0090469 | 42269129  | 5.35  | 2237 | ---++ |
| C20:1n9/C20:0   | 16 | ASGA0073192 | 43402965  | 6.61  | 2237 | +++-- |
| C20:1n9/C20:0   | 16 | DRGA0016154 | 43516213  | 8.94  | 2215 | ---+- |
| C20:1n9/C20:0   | 16 | DRGA0016155 | 43534471  | 17.01 | 2237 | ----  |
| C20:1n9/C20:0   | 16 | MARC0051739 | 44429692  | 13.05 | 2237 | +++++ |
| C20:1n9/C20:0   | 16 | ASGA0073222 | 44919236  | 7.76  | 2237 | ---++ |
| C20:1n9/C20:0   | 16 | DRGA0016166 | 45154456  | 9.21  | 2236 | ---+- |
| C20:1n9/C20:0   | 16 | DRGA0016169 | 45313348  | 7.41  | 2236 | ----+ |
| C20:1n9/C20:0   | 16 | DRGA0016176 | 46066010  | 6.96  | 2237 | ----+ |
| C20:1n9/C20:0   | 16 | ASGA0097650 | 46602679  | 4.64  | 2237 | +++++ |
| C20:1n9/C20:0   | 16 | ASGA0073242 | 46893077  | 7.22  | 2236 | +++++ |
| C20:1n9/C20:0   | 16 | SIRI0000384 | 47011906  | 7.90  | 2237 | +++++ |
| C20:1n9/C20:0   | 16 | MARC0026216 | 47630018  | 5.24  | 2236 | ----  |
| C20:1n9/C20:0   | 16 | ASGA0073252 | 47650300  | 5.01  | 2210 | ----  |
| C20:1n9/C20:0   | 16 | ASGA0073272 | 48203983  | 17.10 | 2235 | ----  |
| C20:1n9/C20:0   | 16 | DRGA0016198 | 48972181  | 5.69  | 2237 | +++-- |
| C20:1n9/C20:0   | 16 | ALGA0090620 | 49083460  | 6.36  | 2236 | ----+ |
| C20:1n9/C20:0   | 16 | MARC0098527 | 49178924  | 5.25  | 2237 | ---+- |
| C20:1n9/C20:0   | 16 | ASGA0084765 | 49185777  | 8.11  | 2237 | -+--- |
| C20:1n9/C20:0   | 16 | ALGA0090674 | 51865432  | 5.19  | 2236 | ---+- |
| C20:1n9/C20:0   | 16 | ASGA0073361 | 52416884  | 6.44  | 2226 | +++++ |
| C20:1n9/C20:0   | 16 | H3GA0046668 | 57488206  | 4.93  | 2237 | +++++ |
| C20:1n9/C20:0   | 16 | ALGA0090834 | 58445833  | 5.04  | 2235 | ----  |
| C20:1n9/C20:0   | 16 | H3GA0046765 | 59605947  | 5.42  | 2187 | ----+ |
| C20:1n9/C20:0   | 16 | ASGA0105593 | 61213135  | 4.91  | 2236 | ----  |
| C20:4n6/C20:2n6 | 1  | MARC0044150 | 286933    | 4.59  | 2237 | ----  |
| C20:4n6/C20:2n6 | 4  | ALGA0026828 | 101428842 | 4.69  | 2236 | ----  |
| C20:4n6/C20:2n6 | 5  | H3GA0016834 | 75797340  | 5.16  | 2236 | ----  |
| C20:4n6/C20:2n6 | 7  | MARC0037137 | 23206164  | 4.56  | 2236 | +---- |
| C20:4n6/C20:2n6 | 7  | MARC0033464 | 35177641  | 4.79  | 2237 | +++++ |
| FattyAI         | 4  | MARC0029984 | 112290496 | 4.63  | 2191 | +++++ |
| FattyAI         | 8  | DIAS0001763 | 120553940 | 5.52  | 2192 | -+--- |
| FattyAI         | 8  | ASGA0092052 | 123806415 | 4.61  | 2181 | +++++ |
| FattyAI         | 10 | MARC0097643 | 40186438  | 4.76  | 2191 | ----  |
| FattyAI         | 14 | ALGA0081039 | 120188229 | 4.74  | 2191 | +++++ |

|                 |    |             |           |      |      |       |
|-----------------|----|-------------|-----------|------|------|-------|
| FattyAI         | 14 | ALGA0081091 | 120986865 | 5.11 | 2192 | ++++- |
| FattyAI         | 14 | CASI0010164 | 121305916 | 8.69 | 2188 | +++++ |
| FattyAI         | 14 | ALGA0081097 | 121330920 | 5.82 | 2192 | ----  |
| FattyAI         | 14 | MARC0111695 | 121418492 | 9.77 | 2192 | ----  |
| FattyAI         | 14 | H3GA0042070 | 121721589 | 5.34 | 2191 | +++++ |
| FattyAI         | 14 | MARC0012665 | 121885281 | 5.50 | 2190 | +++++ |
| FattyAI         | 14 | MARC0083967 | 122323095 | 5.17 | 2192 | +++++ |
| FattyAI         | 14 | ALGA0081147 | 122390223 | 5.35 | 2192 | ----  |
| FattyAI         | 14 | INRA0046735 | 122482603 | 5.16 | 2190 | +++++ |
| FattyAI         | 14 | H3GA0042098 | 122667984 | 4.62 | 2183 | ----  |
| FattyAI         | 14 | ASGA0066162 | 122718232 | 5.84 | 2184 | ----  |
| FattyAI         | 14 | DIAS0004744 | 123268607 | 4.66 | 2190 | +++++ |
| FattyAI         | 14 | MARC0031817 | 123290079 | 5.93 | 2189 | ----  |
| FattyAI         | 18 | ASGA0078884 | 11891293  | 4.89 | 2167 | ----  |
| ACL             | 4  | H3GA0014062 | 118534475 | 6.06 | 2116 | +++++ |
| ACL             | 8  | ASGA0039671 | 121558064 | 5.89 | 2083 | -+--- |
| DBI             | 14 | ALGA0081091 | 120986865 | 5.21 | 2163 | ---+- |
| DBI             | 14 | CASI0010164 | 121305916 | 6.99 | 2159 | ----  |
| DBI             | 14 | ALGA0081097 | 121330920 | 5.01 | 2163 | +++++ |
| DBI             | 14 | MARC0111695 | 121418492 | 7.07 | 2163 | +++++ |
| DBI             | 14 | H3GA0042070 | 121721589 | 6.09 | 2162 | +---- |
| DBI             | 14 | MARC0083967 | 122323095 | 5.49 | 2163 | ----  |
| DBI             | 14 | ASGA0066162 | 122718232 | 5.28 | 2155 | +++++ |
| DBI             | 14 | MARC0031817 | 123290079 | 4.97 | 2160 | +++++ |
| UI              | 14 | ALGA0081091 | 120986865 | 5.21 | 2163 | ---+- |
| UI              | 14 | CASI0010164 | 121305916 | 6.99 | 2159 | ----  |
| UI              | 14 | ALGA0081097 | 121330920 | 5.01 | 2163 | +++++ |
| UI              | 14 | MARC0111695 | 121418492 | 7.07 | 2163 | +++++ |
| UI              | 14 | H3GA0042070 | 121721589 | 6.09 | 2162 | +---- |
| UI              | 14 | MARC0083967 | 122323095 | 5.49 | 2163 | ----  |
| UI              | 14 | ASGA0066162 | 122718232 | 5.28 | 2155 | +++++ |
| UI              | 14 | MARC0031817 | 123290079 | 4.97 | 2160 | +++++ |
| N6              | 9  | MARC0100324 | 129407632 | 4.60 | 1603 | ++++  |
| N3              | 9  | MARC0100324 | 129407632 | 5.17 | 1658 | ++++  |
| N3              | 15 | ALGA0123434 | 1443718   | 5.25 | 1658 | ----  |
| N3              | 15 | MARC0034611 | 4129181   | 4.65 | 1658 | ----  |
| N6/N3           | 15 | ALGA0123434 | 1443718   | 5.45 | 1601 | ++++  |
| C14:1n5/C14:0   | 7  | M1GA0009842 | 31800221  | 5.53 | 1588 | ----  |
| C14:1n5/C14:0   | 7  | MARC0069646 | 34103417  | 4.66 | 1592 | ----  |
| C14:1n5/C14:0   | 12 | ALGA0122316 | 3663932   | 4.61 | 1568 | ++++  |
| C14:1n5/C14:0   | 12 | ALGA0123789 | 13486734  | 4.48 | 1592 | ----  |
| C14:1n5/C14:0   | 14 | CASI0010164 | 121305916 | 6.29 | 1588 | ----  |
| C18:3n6/C18:2n6 | 7  | DRGA0007253 | 18714004  | 6.98 | 1577 | ++++  |

|                 |    |             |           |       |      |      |
|-----------------|----|-------------|-----------|-------|------|------|
| C18:3n6/C18:2n6 | 7  | ASGA0031579 | 18822579  | 6.84  | 1576 | ---- |
| C18:3n6/C18:2n6 | 11 | ASGA0095757 | 25924767  | 4.58  | 1578 | ++++ |
| C18:3n6/C18:2n6 | 17 | INRA0053121 | 26071970  | 4.72  | 1570 | ---- |
| C20:2n6/C18:2n6 | 7  | INRA0024482 | 29619407  | 5.03  | 1639 | ++++ |
| C20:2n6/C18:2n6 | 7  | ALGA0040094 | 33574487  | 5.89  | 1638 | ++++ |
| C20:2n6/C18:2n6 | 7  | MARC0002603 | 43780108  | 4.63  | 1639 | ---- |
| C20:2n6/C18:2n6 | 7  | MARC0034834 | 53102034  | 4.86  | 1640 | ---+ |
| C20:2n6/C18:2n6 | 7  | ALGA0041580 | 53559770  | 5.11  | 1640 | ++++ |
| C20:2n6/C18:2n6 | 7  | ALGA0041977 | 56166104  | 4.50  | 1616 | -+++ |
| C20:2n6/C18:2n6 | 7  | MARC0039911 | 134146665 | 5.51  | 1640 | +--- |
| C20:3n6/C18:2n6 | 2  | ASGA0008883 | 9260718   | 10.16 | 1638 | ++++ |
| C20:3n6/C18:2n6 | 2  | MARC0067088 | 12458499  | 5.72  | 1635 | ++++ |
| C20:3n6/C18:2n6 | 9  | INRA0032055 | 82621184  | 5.35  | 1637 | ++++ |
| C20:3n6/C18:2n6 | 9  | MARC0063505 | 117668749 | 4.77  | 1638 | ---- |
| C20:3n6/C18:3n6 | 7  | DRGA0007253 | 18714004  | 4.95  | 1577 | ---- |
| C20:3n6/C18:3n6 | 7  | ASGA0031579 | 18822579  | 6.49  | 1576 | ++++ |
| C20:3n6/C18:3n6 | 7  | M1GA0027226 | 30592663  | 5.94  | 1573 | ---- |
| C20:3n6/C18:3n6 | 7  | INRA0024930 | 39211095  | 4.75  | 1575 | ---- |
| C20:3n6/C18:3n6 | 7  | ASGA0034040 | 56199605  | 4.81  | 1578 | ++++ |
| C20:3n6/C18:3n6 | 7  | ALGA0043842 | 100195980 | 4.71  | 1551 | ++++ |
| C20:3n3/C18:3n3 | 7  | ASGA0032276 | 32808311  | 6.18  | 1633 | -+++ |
| C20:3n3/C18:3n3 | 7  | H3GA0021439 | 51991520  | 6.55  | 1629 | -+++ |
| C20:3n3/C18:3n3 | 7  | H3GA0021787 | 56866248  | 5.20  | 1633 | ++++ |
| C20:4n6/C18:3n6 | 1  | ASGA0004231 | 121663779 | 5.09  | 1573 | ---- |
| C20:4n6/C18:3n6 | 17 | MARC0061919 | 16920977  | 4.68  | 1570 | ---- |
| C20:4n6/C20:3n6 | 1  | MARC0044150 | 286933    | 5.57  | 1638 | ---- |
| C20:4n6/C20:3n6 | 2  | ASGA0008884 | 9139348   | 5.98  | 1634 | ---- |
| C20:4n6/C20:3n6 | 2  | MARC0067088 | 12458499  | 6.01  | 1635 | ---- |
| C20:4n6/C20:3n6 | 2  | ALGA0012169 | 17537218  | 4.54  | 1637 | ---- |
| C20:4n6/C20:3n6 | 4  | MARC0030157 | 98562527  | 6.14  | 1637 | ++++ |
| C20:4n6/C20:3n6 | 4  | ASGA0020851 | 98609935  | 6.24  | 1638 | ++++ |
| C20:4n6/C20:3n6 | 12 | ALGA0114393 | 58472986  | 4.79  | 1627 | ---- |
| C20:4n6/C20:3n6 | 13 | DRGA0012815 | 122198084 | 5.04  | 1635 | ---- |
| FattyTI         | 3  | H3GA0010308 | 113330960 | 5.19  | 1562 | ---- |
| FattyTI         | 4  | MARC0052574 | 63982652  | 4.67  | 1566 | +++  |
| FattyTI         | 14 | ALGA0081039 | 120188229 | 8.20  | 1565 | ++++ |
| FattyTI         | 14 | ALGA0081040 | 120210617 | 4.56  | 1566 | +++- |
| FattyTI         | 14 | MARC0043866 | 120283339 | 7.54  | 1565 | ---- |
| FattyTI         | 14 | MARC0014536 | 120439354 | 7.44  | 1562 | ++++ |
| FattyTI         | 14 | ALGA0081091 | 120986865 | 10.52 | 1566 | ++-  |
| FattyTI         | 14 | CASI0010164 | 121305916 | 17.17 | 1562 | ++++ |
| FattyTI         | 14 | ALGA0081097 | 121330920 | 11.39 | 1566 | --+  |
| FattyTI         | 14 | MARC0111695 | 121418492 | 17.28 | 1566 | ---- |

|         |    |             |           |       |      |      |
|---------|----|-------------|-----------|-------|------|------|
| FattyTI | 14 | ASGA0066116 | 121467984 | 10.98 | 1566 | ---+ |
| FattyTI | 14 | ALGA0081112 | 121527590 | 8.33  | 1566 | ++++ |
| FattyTI | 14 | H3GA0042070 | 121721589 | 13.91 | 1565 | ++++ |
| FattyTI | 14 | MARC0012665 | 121885281 | 8.60  | 1564 | ++++ |
| FattyTI | 14 | ASGA0066137 | 122043297 | 6.81  | 1524 | +++- |
| FattyTI | 14 | MARC0083967 | 122323095 | 9.29  | 1566 | ++++ |
| FattyTI | 14 | ALGA0081147 | 122390223 | 8.20  | 1566 | ---- |
| FattyTI | 14 | INRA0046735 | 122482603 | 6.96  | 1564 | ++++ |
| FattyTI | 14 | H3GA0042098 | 122667984 | 6.00  | 1563 | ---- |
| FattyTI | 14 | ASGA0066162 | 122718232 | 8.88  | 1563 | ---- |
| FattyTI | 14 | MARC0091464 | 122956381 | 7.17  | 1565 | ++++ |
| FattyTI | 14 | ASGA0066177 | 123214577 | 5.11  | 1565 | ++-- |
| FattyTI | 14 | DIAS0004744 | 123268607 | 6.86  | 1564 | ++++ |
| FattyTI | 14 | MARC0031817 | 123290079 | 11.57 | 1563 | ---- |

## Supplementary Table 2

**Significant loci surpassing the suggestive threshold in the meta-analysis across five populations.** Chr: chromosome; Position: the genomic position on the *Sscrofa* 10.2 pig genome assembly; *P*-value: the statistical *P* values based on the sample size weighted analysis; Weight: the number of individuals contributing to the particular *P*-value; Direction: the corresponding direction of the effect for the QTL allele on F<sub>2</sub>, Sutai, DLY, Erhualian and Laiwu pigs, respectively; +, positive effect; -, negative effect.



| Feature                                                                     | FDR      | Genes in network | Genes in genome |
|-----------------------------------------------------------------------------|----------|------------------|-----------------|
| fatty acid metabolic process                                                | 1.17E-18 | 18               | 209             |
| acylglycerol metabolic process                                              | 3.16E-16 | 13               | 85              |
| neutral lipid metabolic process                                             | 3.16E-16 | 13               | 85              |
| triglyceride metabolic process                                              | 6.68E-15 | 12               | 79              |
| long-chain fatty-acyl-CoA metabolic process                                 | 6.68E-15 | 9                | 22              |
| fatty-acyl-CoA metabolic process                                            | 1.46E-14 | 9                | 24              |
| fatty-acyl-CoA biosynthetic process                                         | 9.02E-14 | 8                | 17              |
| long-chain fatty-acyl-CoA biosynthetic process                              | 9.02E-14 | 8                | 17              |
| triglyceride biosynthetic process                                           | 1.62E-13 | 10               | 50              |
| neutral lipid biosynthetic process                                          | 2.03E-13 | 10               | 52              |
| acylglycerol biosynthetic process                                           | 2.03E-13 | 10               | 52              |
| fatty acid biosynthetic process                                             | 2.20E-13 | 11               | 79              |
| thioester biosynthetic process                                              | 1.63E-11 | 8                | 31              |
| acyl-CoA biosynthetic process                                               | 1.63E-11 | 8                | 31              |
| acyl-CoA metabolic process                                                  | 2.09E-11 | 9                | 54              |
| thioester metabolic process                                                 | 2.09E-11 | 9                | 54              |
| monocarboxylic acid biosynthetic process                                    | 2.66E-11 | 11               | 124             |
| very long-chain fatty acid metabolic process                                | 8.15E-11 | 7                | 21              |
| glycerolipid metabolic process                                              | 2.42E-10 | 13               | 271             |
| carboxylic acid biosynthetic process                                        | 1.71E-09 | 11               | 184             |
| organic acid biosynthetic process                                           | 1.71E-09 | 11               | 184             |
| coenzyme metabolic process                                                  | 1.84E-09 | 10               | 133             |
| coenzyme biosynthetic process                                               | 3.48E-09 | 8                | 61              |
| cholesterol metabolic process                                               | 9.31E-09 | 8                | 69              |
| glycerolipid biosynthetic process                                           | 9.58E-09 | 11               | 219             |
| long-chain fatty acid metabolic process                                     | 1.71E-08 | 8                | 75              |
| cofactor metabolic process                                                  | 2.62E-08 | 10               | 177             |
| sterol metabolic process                                                    | 2.70E-08 | 8                | 80              |
| unsaturated fatty acid metabolic process                                    | 2.89E-08 | 8                | 81              |
| cofactor biosynthetic process                                               | 3.41E-08 | 8                | 83              |
| cholesterol biosynthetic process                                            | 1.84E-07 | 6                | 33              |
| sterol biosynthetic process                                                 | 2.16E-07 | 6                | 34              |
| alpha-linolenic acid metabolic process                                      | 8.63E-06 | 4                | 11              |
| linoleic acid metabolic process                                             | 8.63E-06 | 4                | 11              |
| transferase activity, transferring acyl groups other than amino-acyl groups | 1.85E-05 | 7                | 121             |
| steroid metabolic process                                                   | 2.68E-05 | 8                | 196             |
| transferase activity, transferring acyl groups                              | 5.82E-05 | 7                | 144             |
| alcohol biosynthetic process                                                | 1.50E-04 | 6                | 101             |
| steroid biosynthetic process                                                | 2.05E-04 | 6                | 107             |
| alcohol metabolic process                                                   | 2.36E-04 | 8                | 264             |
| organic hydroxy compound biosynthetic process                               | 4.89E-04 | 6                | 125             |

|                                                       |          |   |     |
|-------------------------------------------------------|----------|---|-----|
| lipid particle                                        | 1.83E-03 | 4 | 40  |
| lipid storage                                         | 2.39E-03 | 4 | 43  |
| neutral lipid catabolic process                       | 1.54E-02 | 3 | 24  |
| acylglycerol catabolic process                        | 1.54E-02 | 3 | 24  |
| regulation of lipid biosynthetic process              | 2.54E-02 | 4 | 79  |
| regulation of lipid metabolic process                 | 3.03E-02 | 5 | 162 |
| neuronal action potential                             | 3.15E-02 | 3 | 31  |
| glycerolipid catabolic process                        | 3.40E-02 | 3 | 32  |
| regulation of lipid storage                           | 4.01E-02 | 3 | 34  |
| integral component of endoplasmic reticulum membrane  | 4.51E-02 | 4 | 94  |
| intrinsic component of endoplasmic reticulum membrane | 4.60E-02 | 4 | 95  |
| axon ensheathment                                     | 4.79E-02 | 3 | 37  |
| ensheathment of neurons                               | 4.79E-02 | 3 | 37  |
| unsaturated fatty acid biosynthetic process           | 7.39E-02 | 3 | 43  |
| cellular lipid catabolic process                      | 8.34E-02 | 4 | 113 |

### **Supplementary Table 3.**

**Functional enrichment analysis involved by the candidate genes in this study.**

Feature is the biological pathway name involved by the candidate genes; FDR: false discovery rate.

| Group         | Name                       | Weight | PubMed                                                                                                | Source                                                                    |
|---------------|----------------------------|--------|-------------------------------------------------------------------------------------------------------|---------------------------------------------------------------------------|
| Co-expression | Innocenti-Brown-2011       | 11.97% | <a href="http://www.ncbi.nlm.nih.gov/pubmed/21637794">http://www.ncbi.nlm.nih.gov/pubmed/21637794</a> | Pearson correlation with 579,361 interactions from GEO                    |
| Co-expression | Mallon-McKay-2013          | 6.65%  | <a href="http://www.ncbi.nlm.nih.gov/pubmed/23117585">http://www.ncbi.nlm.nih.gov/pubmed/23117585</a> | Pearson correlation with 567,140 interactions from GEO                    |
| Co-expression | Smirnov-Cheung-2009        | 6.15%  | <a href="http://www.ncbi.nlm.nih.gov/pubmed/19349959">http://www.ncbi.nlm.nih.gov/pubmed/19349959</a> | Pearson correlation with 463,390 interactions from GEO                    |
| Co-expression | Chen-Brown-2002            | 6.05%  | <a href="http://www.ncbi.nlm.nih.gov/pubmed/12058060">http://www.ncbi.nlm.nih.gov/pubmed/12058060</a> | Pearson correlation with 275,649 interactions from supplementary material |
| Co-expression | Roth-Zlotnik-2006          | 5.92%  | <a href="http://www.ncbi.nlm.nih.gov/pubmed/16572319">http://www.ncbi.nlm.nih.gov/pubmed/16572319</a> | Pearson correlation with 666,614 interactions from GEO                    |
| Co-expression | Rieger-Chu-2004            | 5.61%  | <a href="http://www.ncbi.nlm.nih.gov/pubmed/15096622">http://www.ncbi.nlm.nih.gov/pubmed/15096622</a> | Pearson correlation with 259,055 interactions from GEO                    |
| Co-expression | Burington-Shaughnessy-2008 | 3.72%  | <a href="http://www.ncbi.nlm.nih.gov/pubmed/18676754">http://www.ncbi.nlm.nih.gov/pubmed/18676754</a> | Pearson correlation with 293,587 interactions from GEO                    |
| Co-expression | Gysin-McMahon-2012         | 2.21%  | <a href="http://www.ncbi.nlm.nih.gov/pubmed/22833572">http://www.ncbi.nlm.nih.gov/pubmed/22833572</a> | Pearson correlation with 388,454 interactions from GEO                    |
| Co-expression | Salaverria-Siebert-2011    | 2.11%  | <a href="http://www.ncbi.nlm.nih.gov/pubmed/21487109">http://www.ncbi.nlm.nih.gov/pubmed/21487109</a> | Pearson correlation with 514,070 interactions from GEO                    |
| Co-expression | Arijs-Rutgeerts-2009       | 1.16%  | <a href="http://www.ncbi.nlm.nih.gov/pubmed/19956723">http://www.ncbi.nlm.nih.gov/pubmed/19956723</a> | Pearson correlation with 653,194 interactions from GEO                    |
| Co-expression | Bild-Nevins-2006 B         | 1.00%  | <a href="http://www.ncbi.nlm.nih.gov/pubmed/16273092">http://www.ncbi.nlm.nih.gov/pubmed/16273092</a> | Pearson correlation with 282,582 interactions from GEO                    |
| Co-expression | Cheok-Evans-2003           | 0.68%  | <a href="http://www.ncbi.nlm.nih.gov/pubmed/12704389">http://www.ncbi.nlm.nih.gov/pubmed/12704389</a> | Pearson correlation with 263,940 interactions from GEO                    |
| Co-expression | Kang-Willman-2010          | 0.55%  | <a href="http://www.ncbi.nlm.nih.gov/pubmed/19880498">http://www.ncbi.nlm.nih.gov/pubmed/19880498</a> | Pearson correlation with 656,632 interactions from GEO                    |
| Co-expression | Boldrick-Relman-2002       | 0.54%  | <a href="http://www.ncbi.nlm.nih.gov/pubmed/11805339">http://www.ncbi.nlm.nih.gov/pubmed/11805339</a> | Pearson correlation with 108,543 interactions from supplementary material |
| Co-expression | Bahr-Bowler-2013           | 0.30%  | <a href="http://www.ncbi.nlm.nih.gov/pubmed/23590301">http://www.ncbi.nlm.nih.gov/pubmed/23590301</a> | Pearson correlation with 278,447 interactions from GEO                    |
| Co-expression | Perou-Botstein-1999        | 0.24%  | <a href="http://www.ncbi.nlm.nih.gov/pubmed/10430922">http://www.ncbi.nlm.nih.gov/pubmed/10430922</a> | Pearson correlation with 62,886 interactions from supplementary material  |
| Co-expression | Wu-Garvey-2007             | 0.04%  | <a href="http://www.ncbi.nlm.nih.gov/pubmed/17709892">http://www.ncbi.nlm.nih.gov/pubmed/17709892</a> | Pearson correlation with 260,762 interactions from GEO                    |

|                        |                                            |        |                                                                                                       |                                                             |
|------------------------|--------------------------------------------|--------|-------------------------------------------------------------------------------------------------------|-------------------------------------------------------------|
| Co-expression          | Wang-Maris-2006                            | 0.02%  | <a href="http://www.ncbi.nlm.nih.gov/pubmed/16778177">http://www.ncbi.nlm.nih.gov/pubmed/16778177</a> | Pearson correlation with 264,234 interactions from GEO      |
| Co-localization        | Johnson-Shoemaker-2003                     | 3.86%  | <a href="http://www.ncbi.nlm.nih.gov/pubmed/14684825">http://www.ncbi.nlm.nih.gov/pubmed/14684825</a> | Pearson correlation with 426,640 interactions from GEO      |
| Genetic interactions   | Lin-Smith-2010                             | 0.23%  | <a href="http://www.ncbi.nlm.nih.gov/pubmed/20508145">http://www.ncbi.nlm.nih.gov/pubmed/20508145</a> | with 4,836,794 interactions from supplementary material     |
| Pathway                | Wu-Stein-2010                              | 7.11%  | <a href="http://www.ncbi.nlm.nih.gov/pubmed/20482850">http://www.ncbi.nlm.nih.gov/pubmed/20482850</a> | with 78,183 interactions from supplementary material        |
| Physical interactions  | Albers-Koegl-2005                          | 0.34%  | <a href="http://www.ncbi.nlm.nih.gov/pubmed/15604093">http://www.ncbi.nlm.nih.gov/pubmed/15604093</a> | Direct interaction with 327 interactions from iRefIndex     |
| Physical interactions  | IREF-BIND                                  | 0.04%  |                                                                                                       | Direct interaction with 7,078 interactions from iRefIndex   |
| Predicted              | I2D-vonMering-Bork-2002-Medium-Yeast2Human | 15.70% | <a href="http://www.ncbi.nlm.nih.gov/pubmed/12000970">http://www.ncbi.nlm.nih.gov/pubmed/12000970</a> | Direct interaction with 3,001 interactions from I2D         |
| Predicted              | I2D-BioGRID-Yeast2Human                    | 5.87%  | <a href="http://www.ncbi.nlm.nih.gov/pubmed/16381927">http://www.ncbi.nlm.nih.gov/pubmed/16381927</a> | Direct interaction with 13,302 interactions from I2D        |
| Shared protein domains | INTERPRO                                   | 8.19%  |                                                                                                       | Pearson correlation with 562,560 interactions from InterPro |
| Shared protein domains | PFAM                                       | 3.73%  |                                                                                                       | Pearson correlation with 543,464 interactions from Pfam     |

#### Supplementary Table 4.

Network enrichment analysis for candidate genes highlighted in this study.

**Zhang *et al.*, Supplementary Table 4**
